# Supplementary material for: Construction of coumarin-fused pyrido[2,3-b]porphyrins through a trichloroacetic acid-accelerated domino approach
Source: Royal Society of Chemistry journal article supplement (doi:10.1039/d0ob00171f), 2020-01-01
Supplement: d0ob00171f1.pdf [file d0ob00171f1.pdf]

## SUPPLEMENTARY DATA

### **Construction of coumarin-fused pyrido[2,3-*b*]porphyrins through trichloroacetic acid-accelerated domino approach**

Chandra Sekhar Tekuri, Pargat Singh and Mahendra Nath\*

*Department of Chemistry, University of Delhi, Delhi 110 007, India*

*\* Corresponding author. e-mail: [mnath@chemistry.du.ac.in](mailto:mnath@chemistry.du.ac.in)*

| <b>Table of content</b>                                              | <b>Page</b> |
|----------------------------------------------------------------------|-------------|
| Proposed mechanistic pathway                                         | 2           |
| Electronic absorption spectra of products ( <b>6a-i</b> ) and Ni-TPP | 3           |
| Copies of NMR and mass spectra of new products                       | 4-35        |

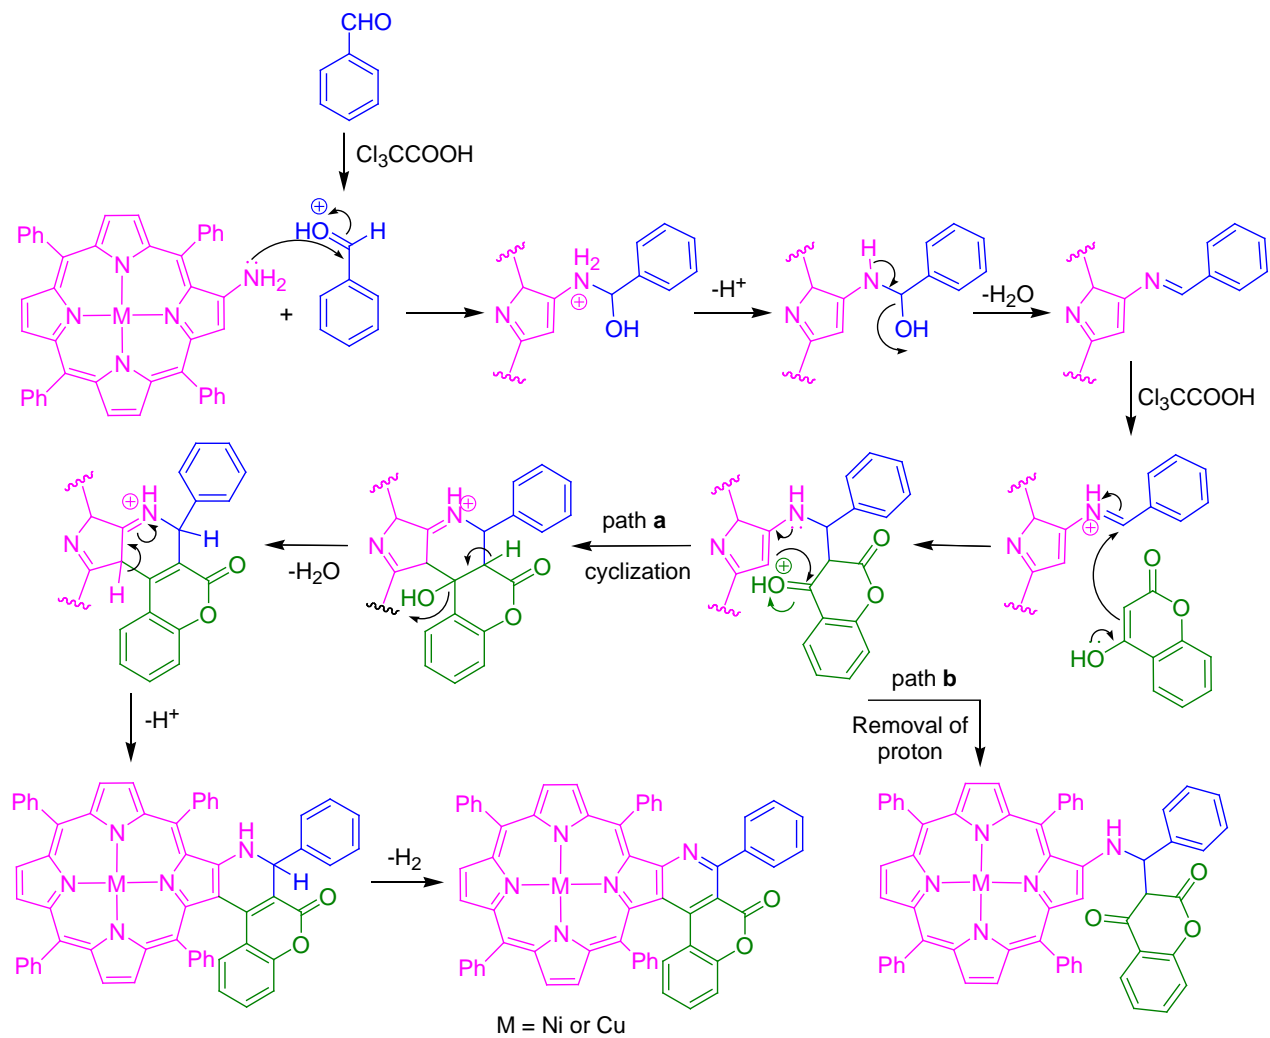

**Figure S1.** Proposed mechanism for the formation of pyrido[2,3-*b*]porphyrins (**6a-i** and **7**).

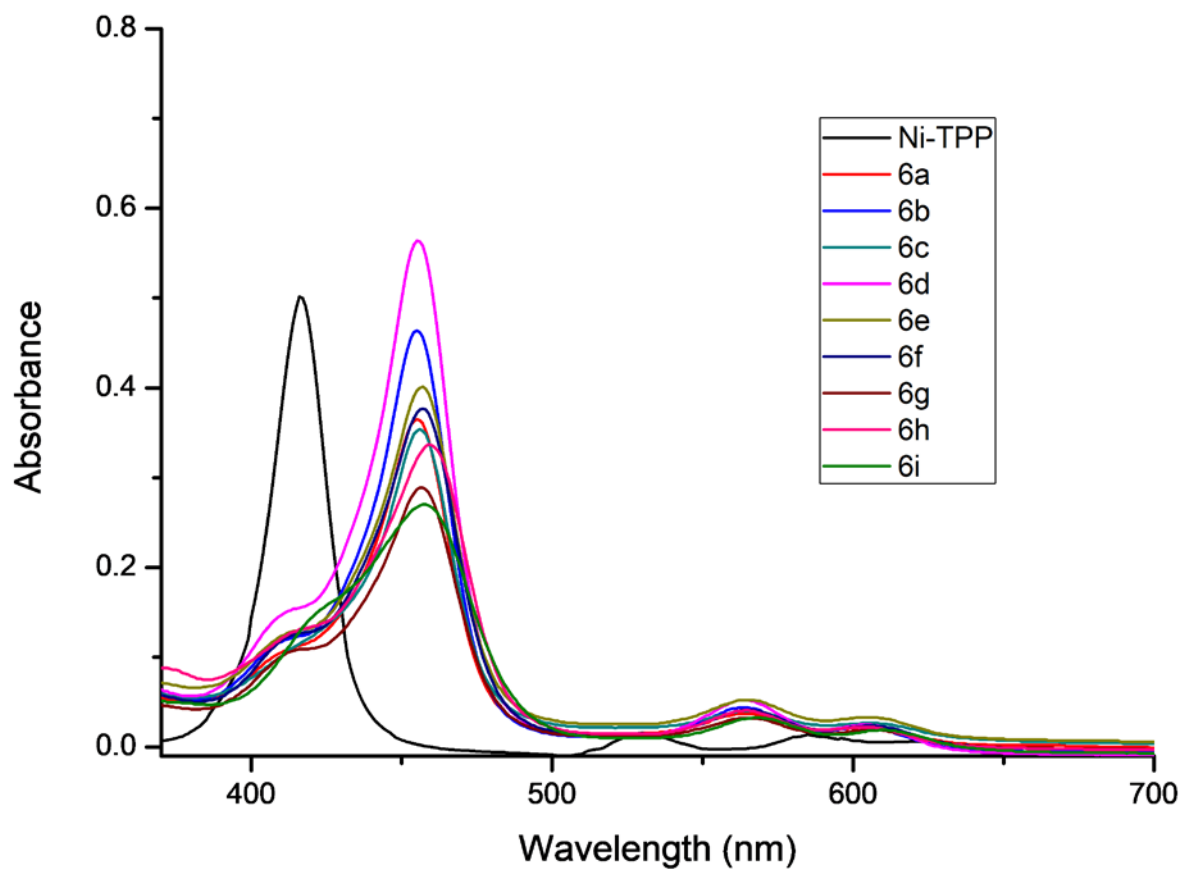

**Figure S2.** UV-Vis spectra of nickel(II) pyrido[2,3-*b*]porphyrins (6a-i) and Ni-TPP in  $\text{CHCl}_3$  ( $1.5 \times 10^{-6} \text{ mol L}^{-1}$ ) at 298 K.

## NMR and mass spectra of newly synthesized porphyrins.

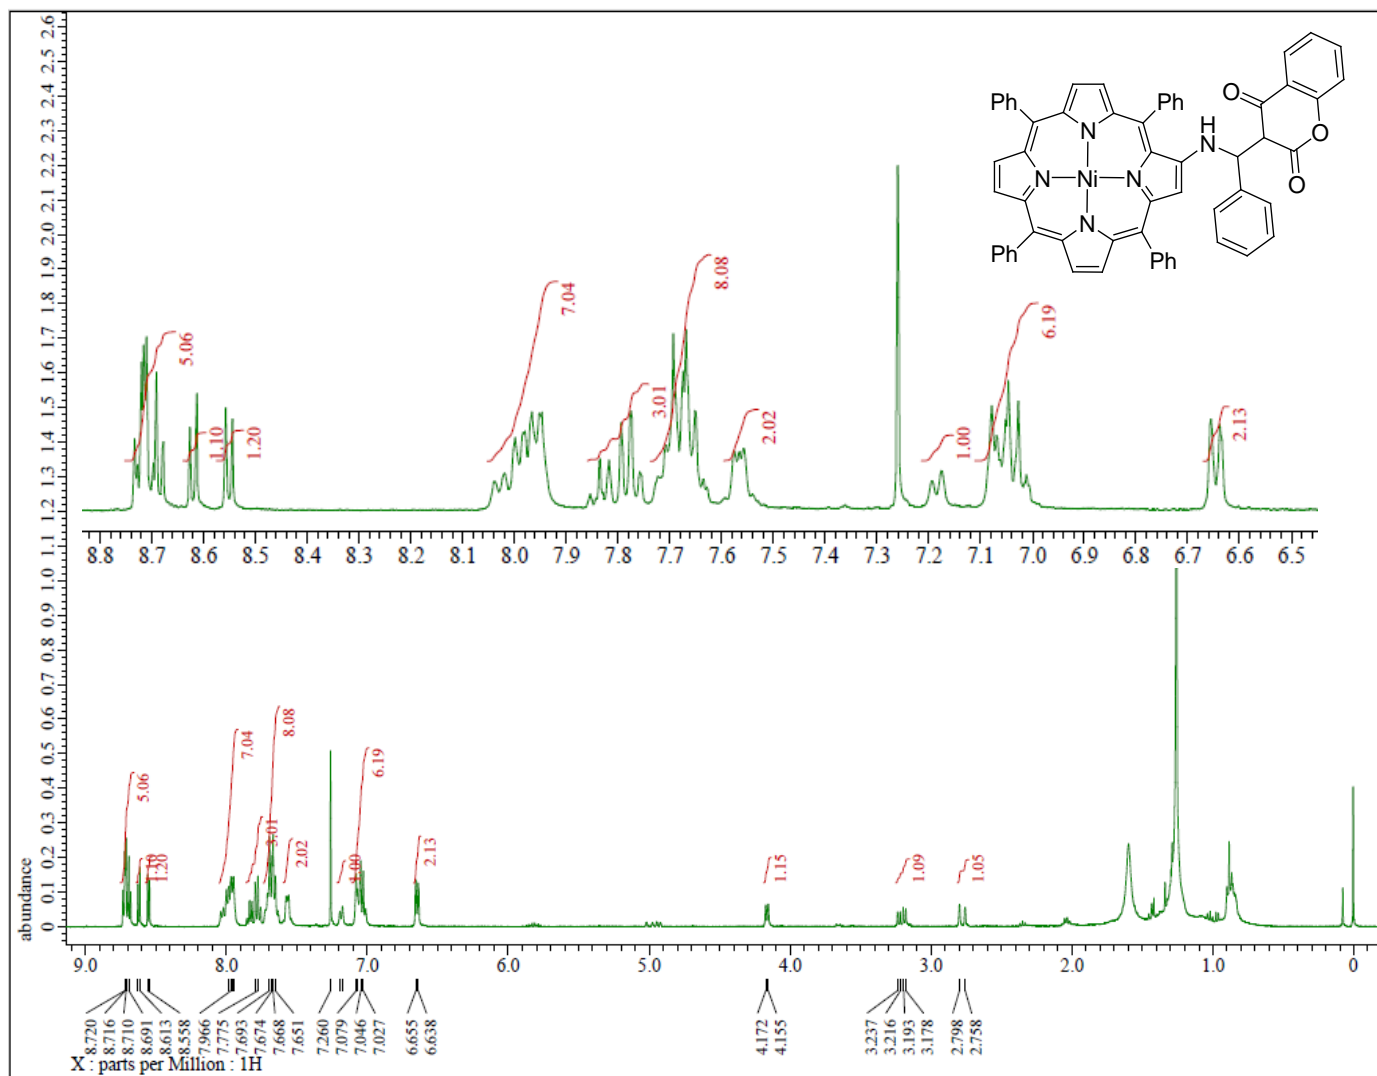Figure S3.  $^1\text{H}$  NMR spectrum of compound (4) in  $\text{CDCl}_3$ .

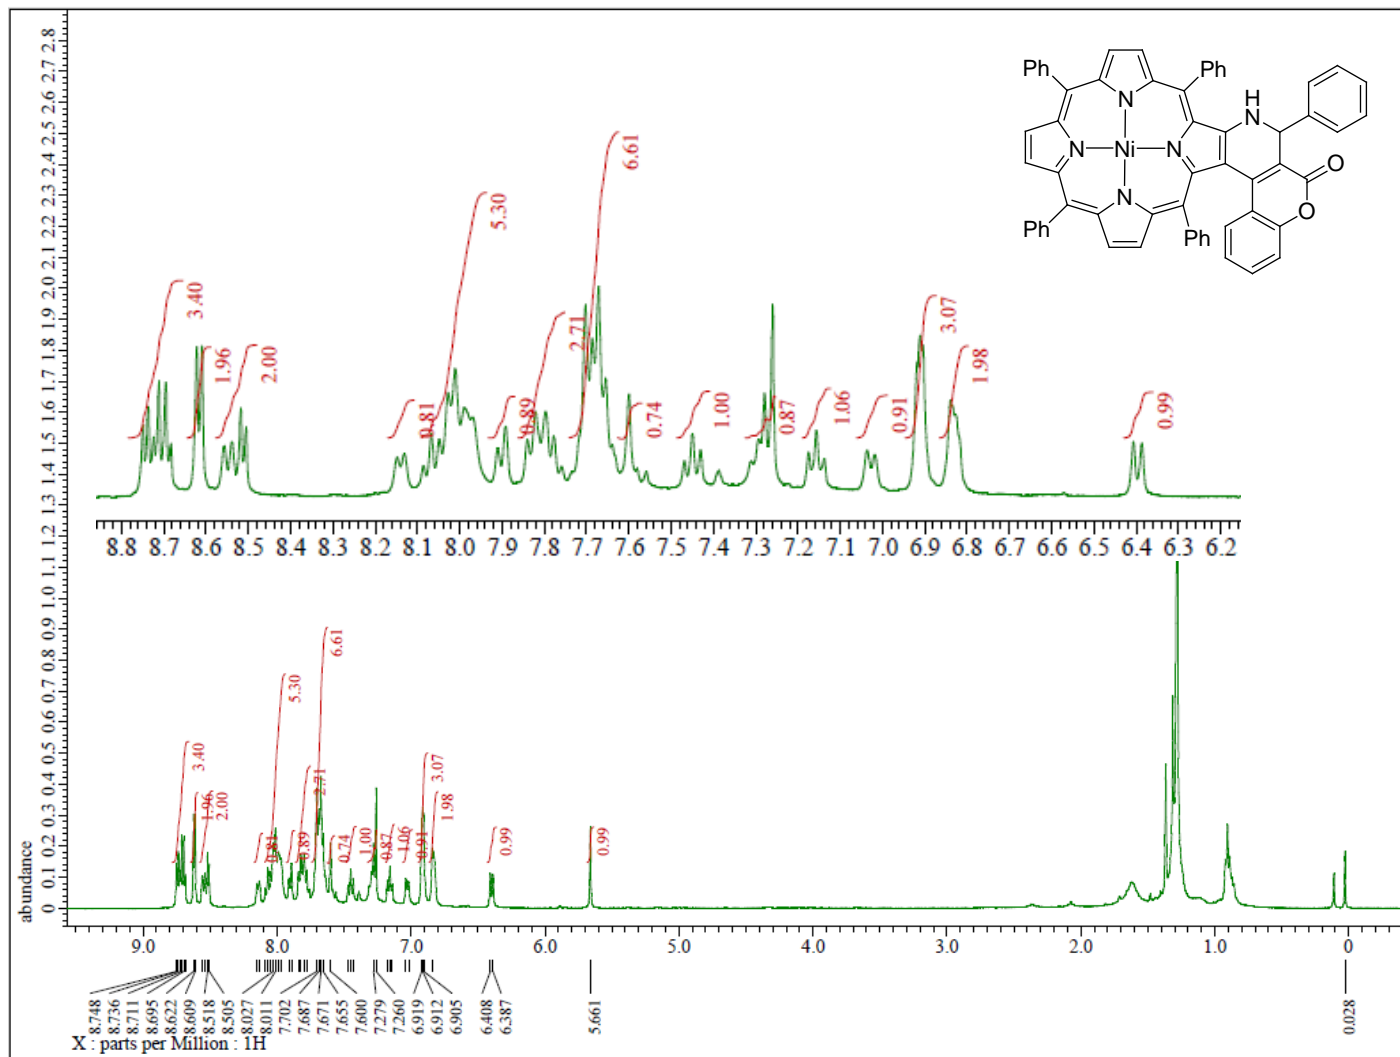

**Figure S4.**  $^1\text{H}$  NMR spectrum of compound (5) in  $\text{CDCl}_3$ .

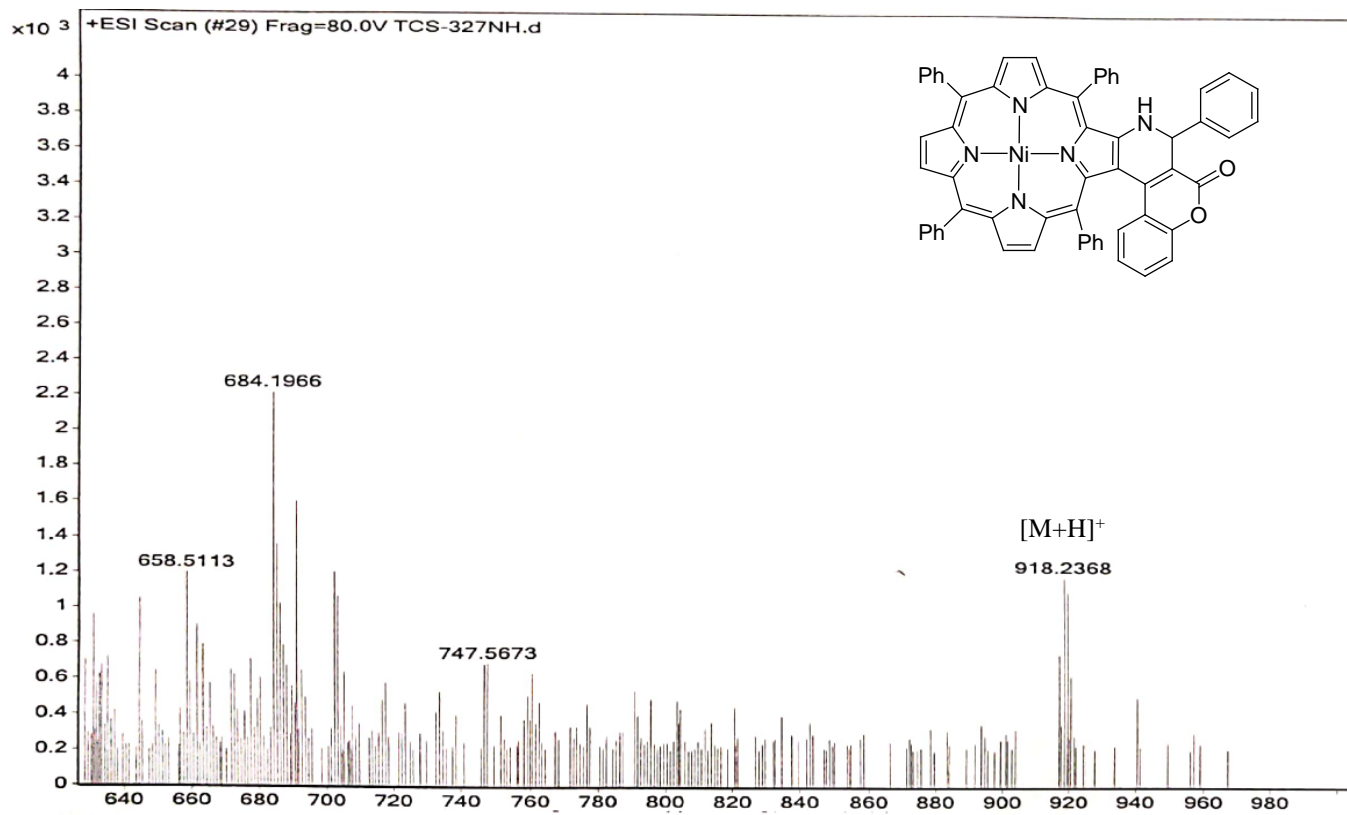

**Figure S5.** ESI mass spectrum of compound (5)

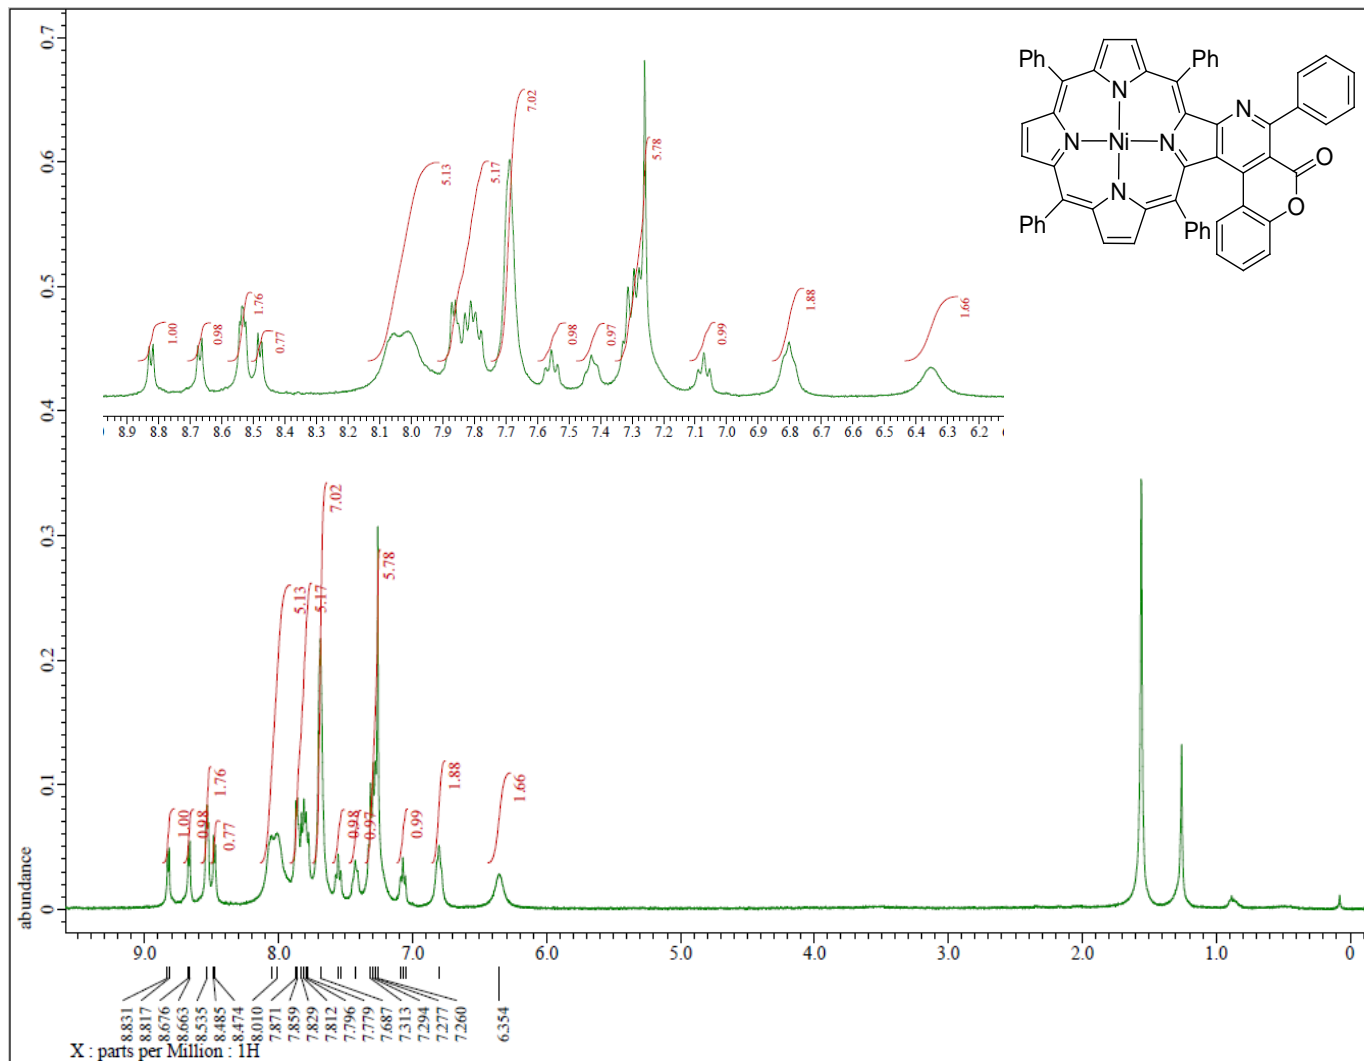

**Figure S6.**  $^1\text{H}$  NMR spectrum of compound (6a) in  $\text{CDCl}_3$ .

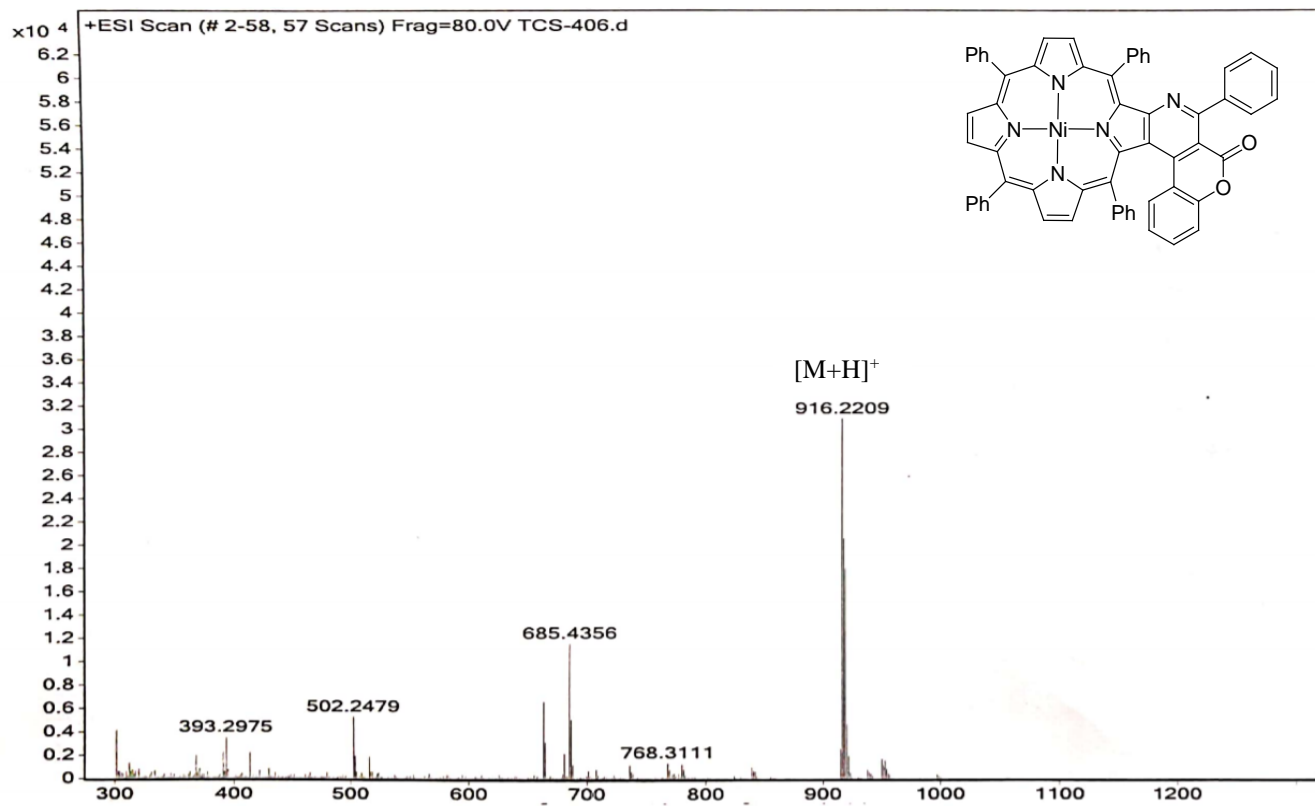

**Figure S7.** ESI mass spectrum of compound (**6a**)



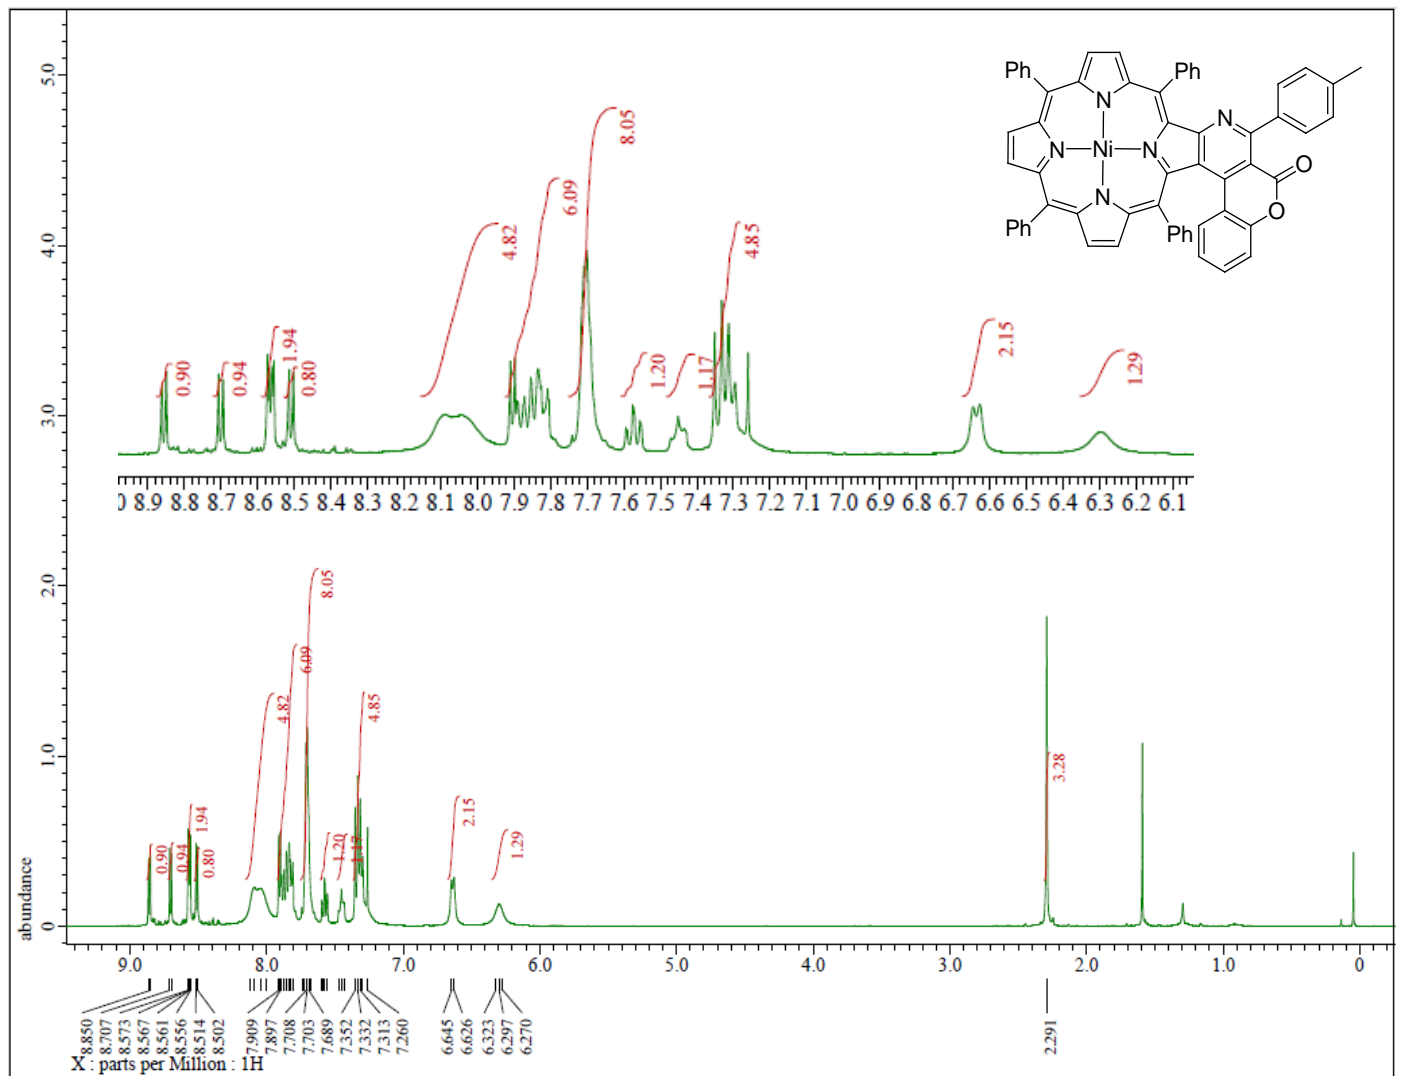

**Figure S8.**  $^1\text{H}$  NMR spectrum of compound **(6b)** in  $\text{CDCl}_3$

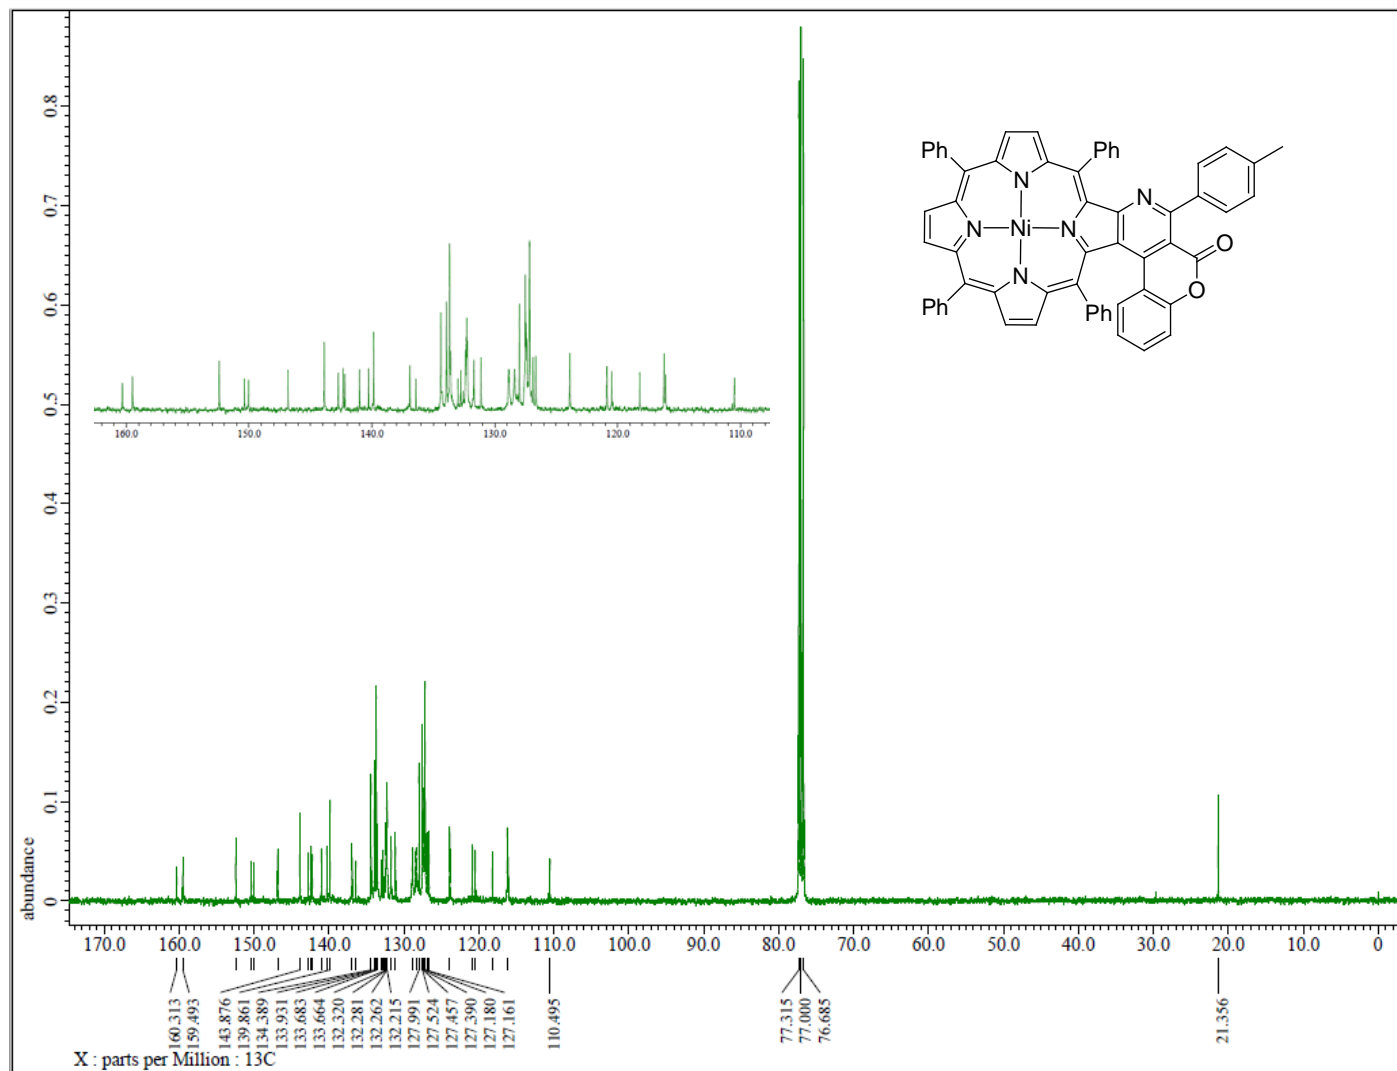

**Figure S9.**  $^{13}\text{C}$  NMR spectrum of compound (6b) in  $\text{CDCl}_3$

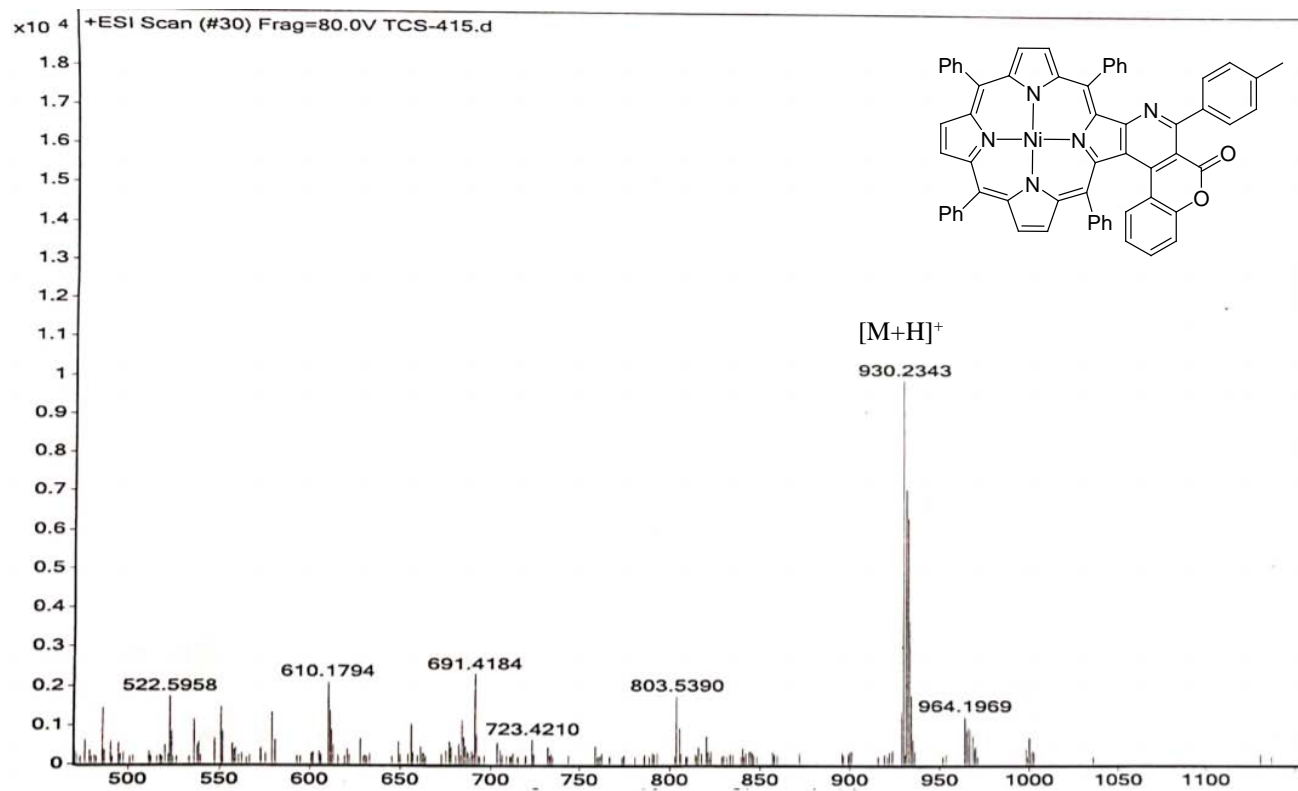

Figure S10. ESI mass spectrum of compound (6b)

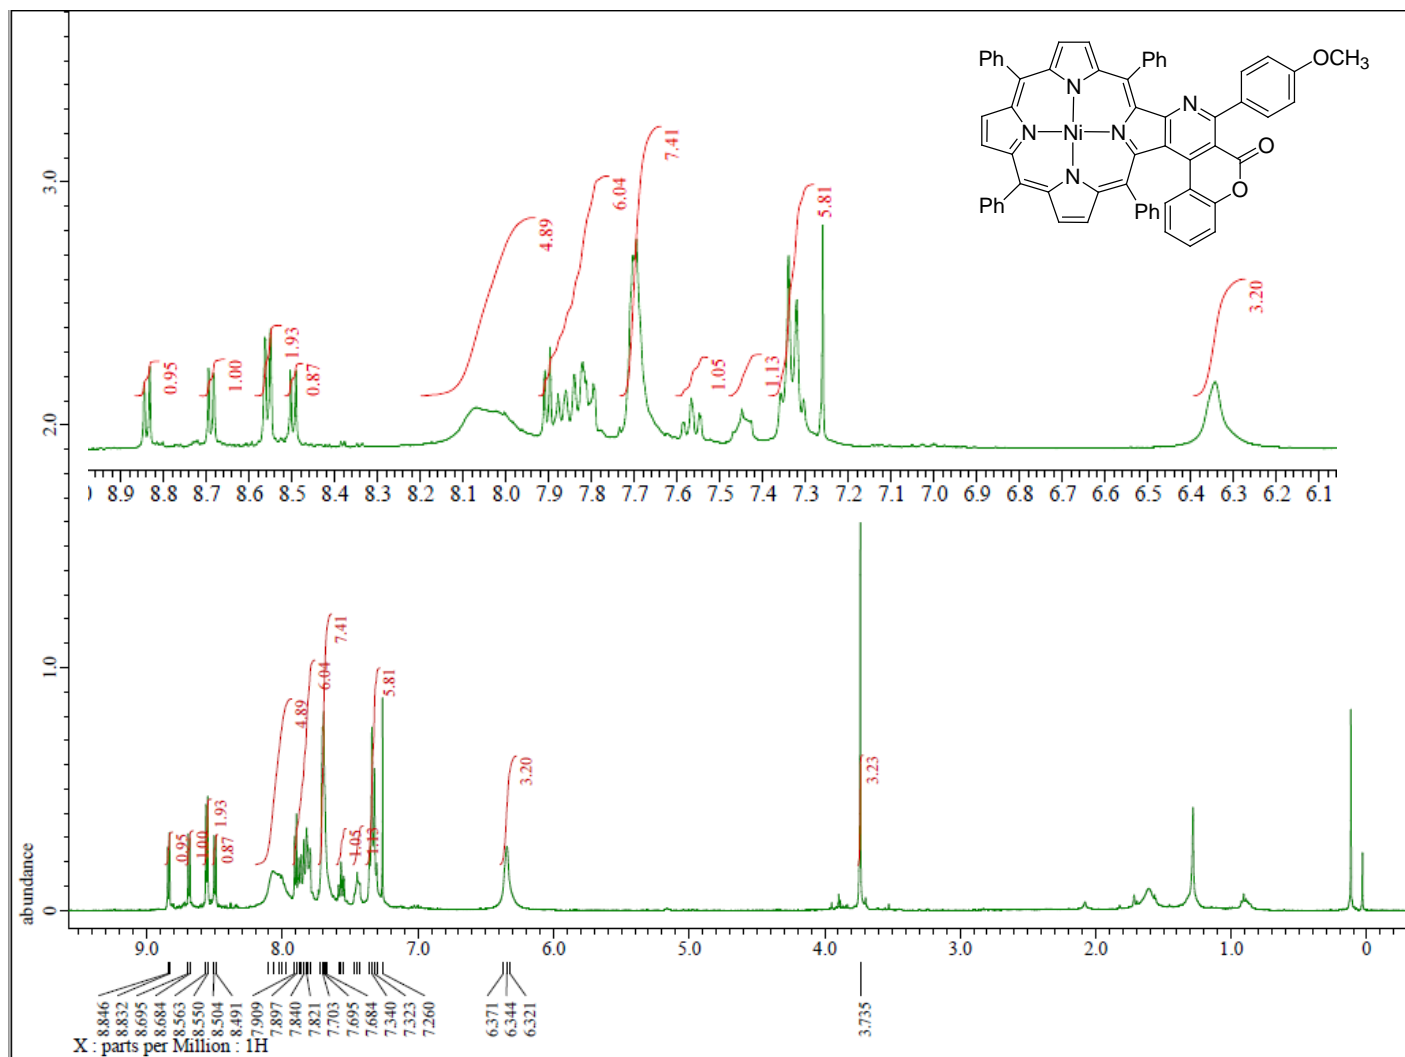

**Figure S11.**  $^1\text{H}$  NMR spectrum of compound **(6c)** in  $\text{CDCl}_3$

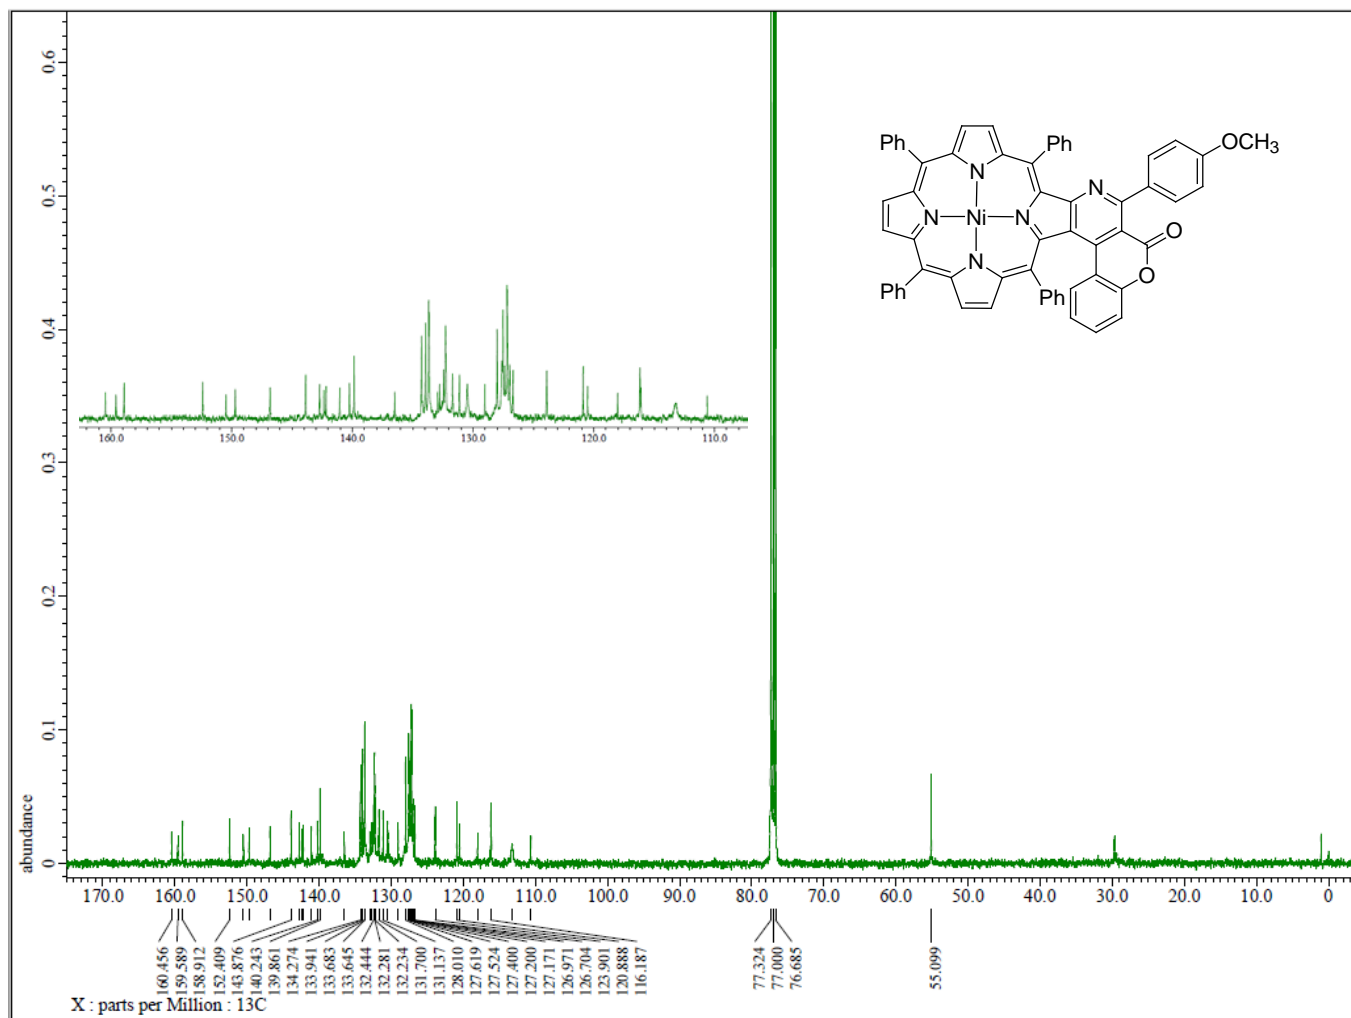

**Figure S12.**  $^{13}\text{C}$  NMR spectrum of compound (6c) in  $\text{CDCl}_3$

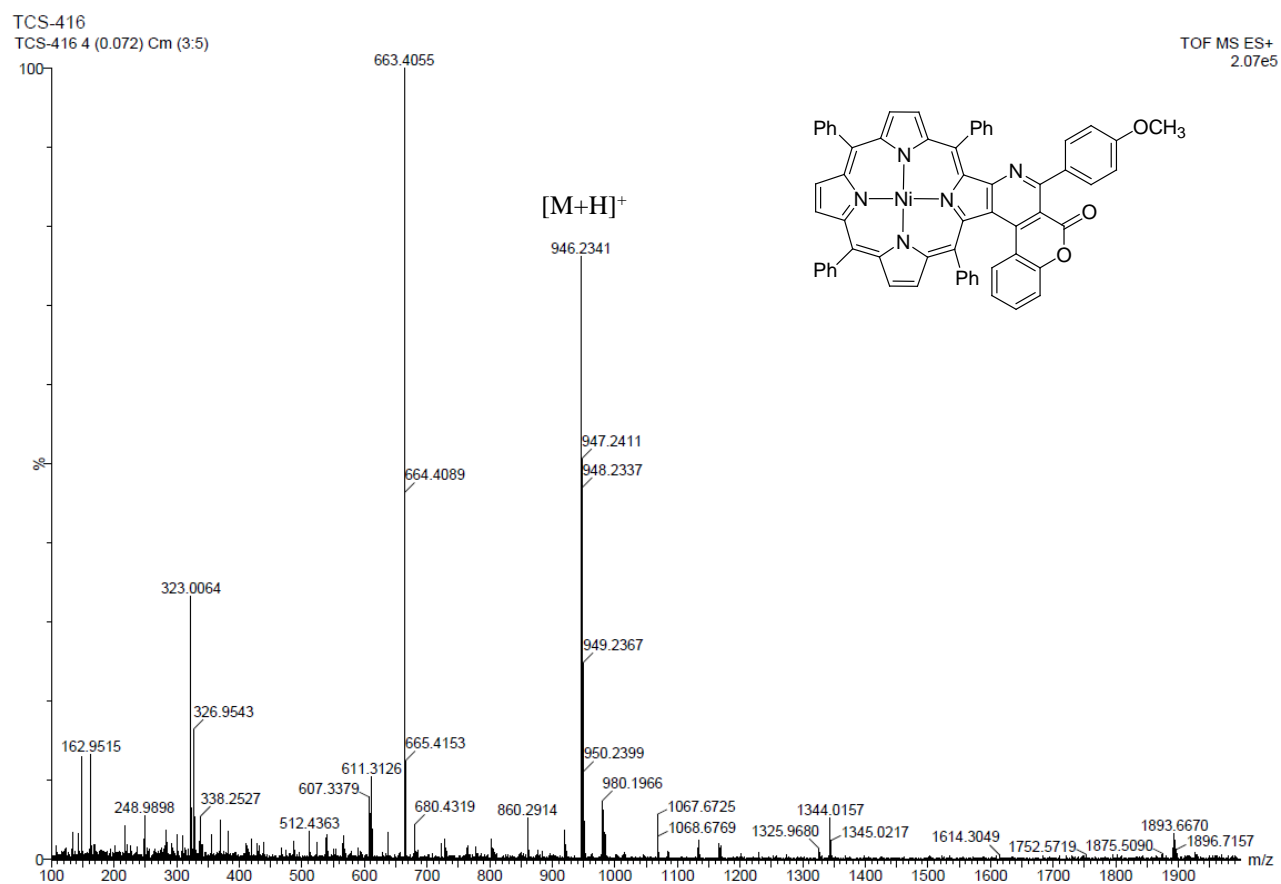

Figure S13. ESI mass spectrum of compound (6c)

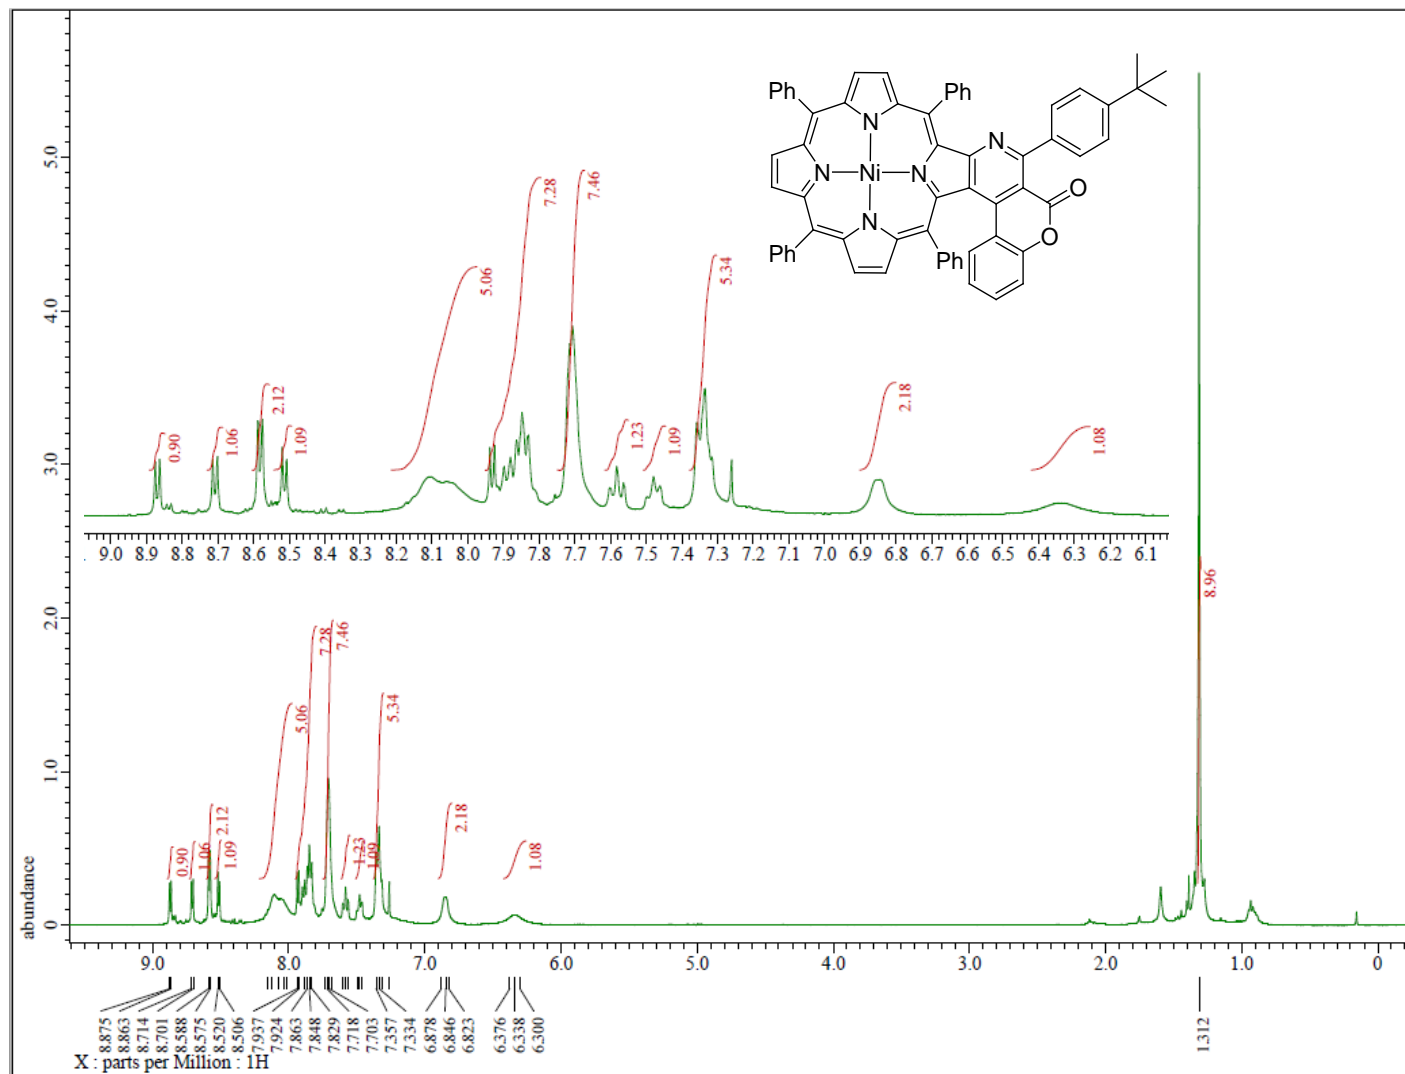

**Figure S14.**  $^1\text{H}$  NMR spectrum of compound **(6d)** in  $\text{CDCl}_3$

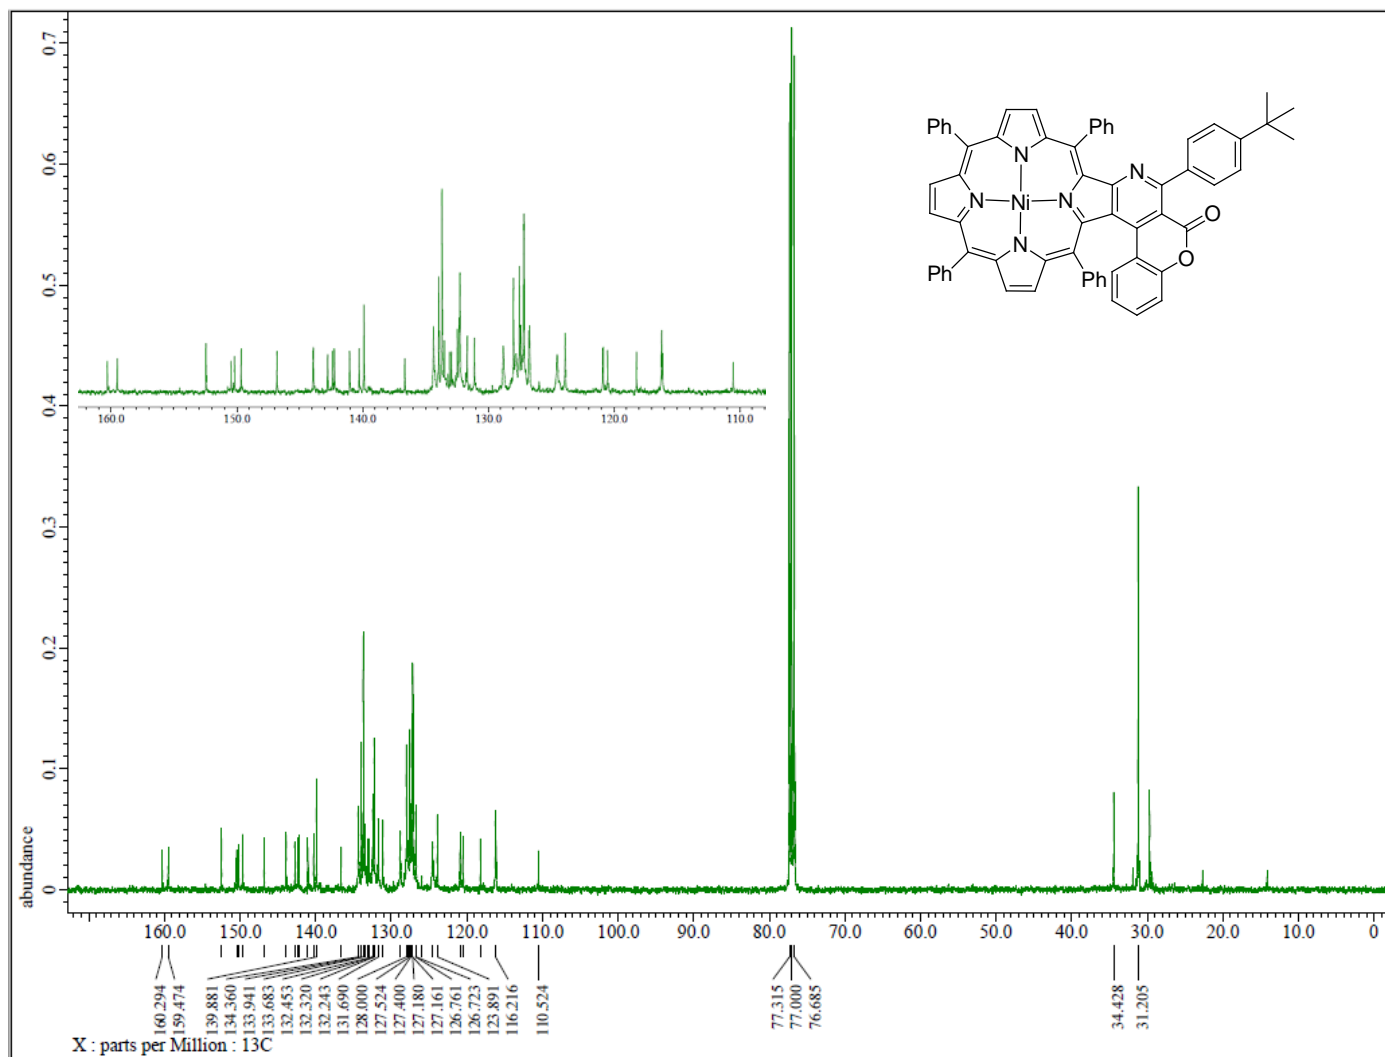

**Figure S15.**  $^{13}\text{C}$  NMR spectrum of compound **(6d)** in  $\text{CDCl}_3$



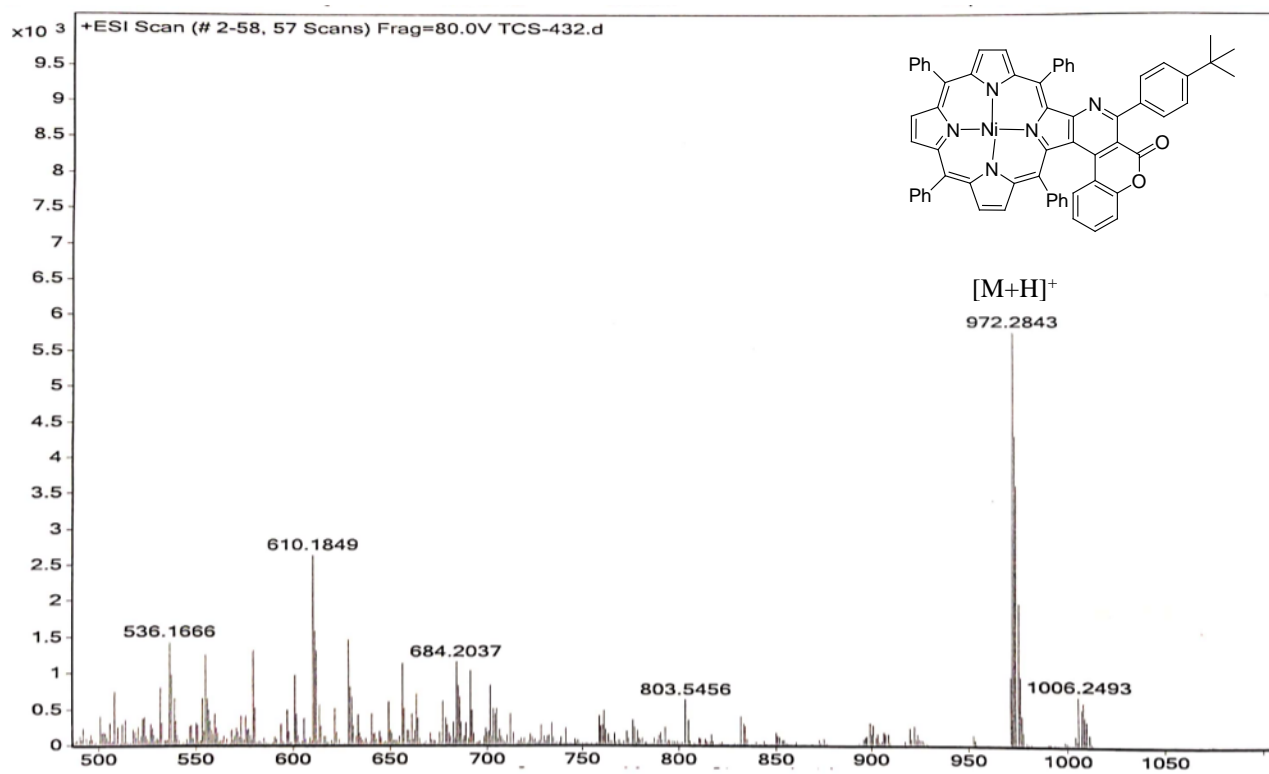

Figure S16. ESI mass spectrum of compound (6d)

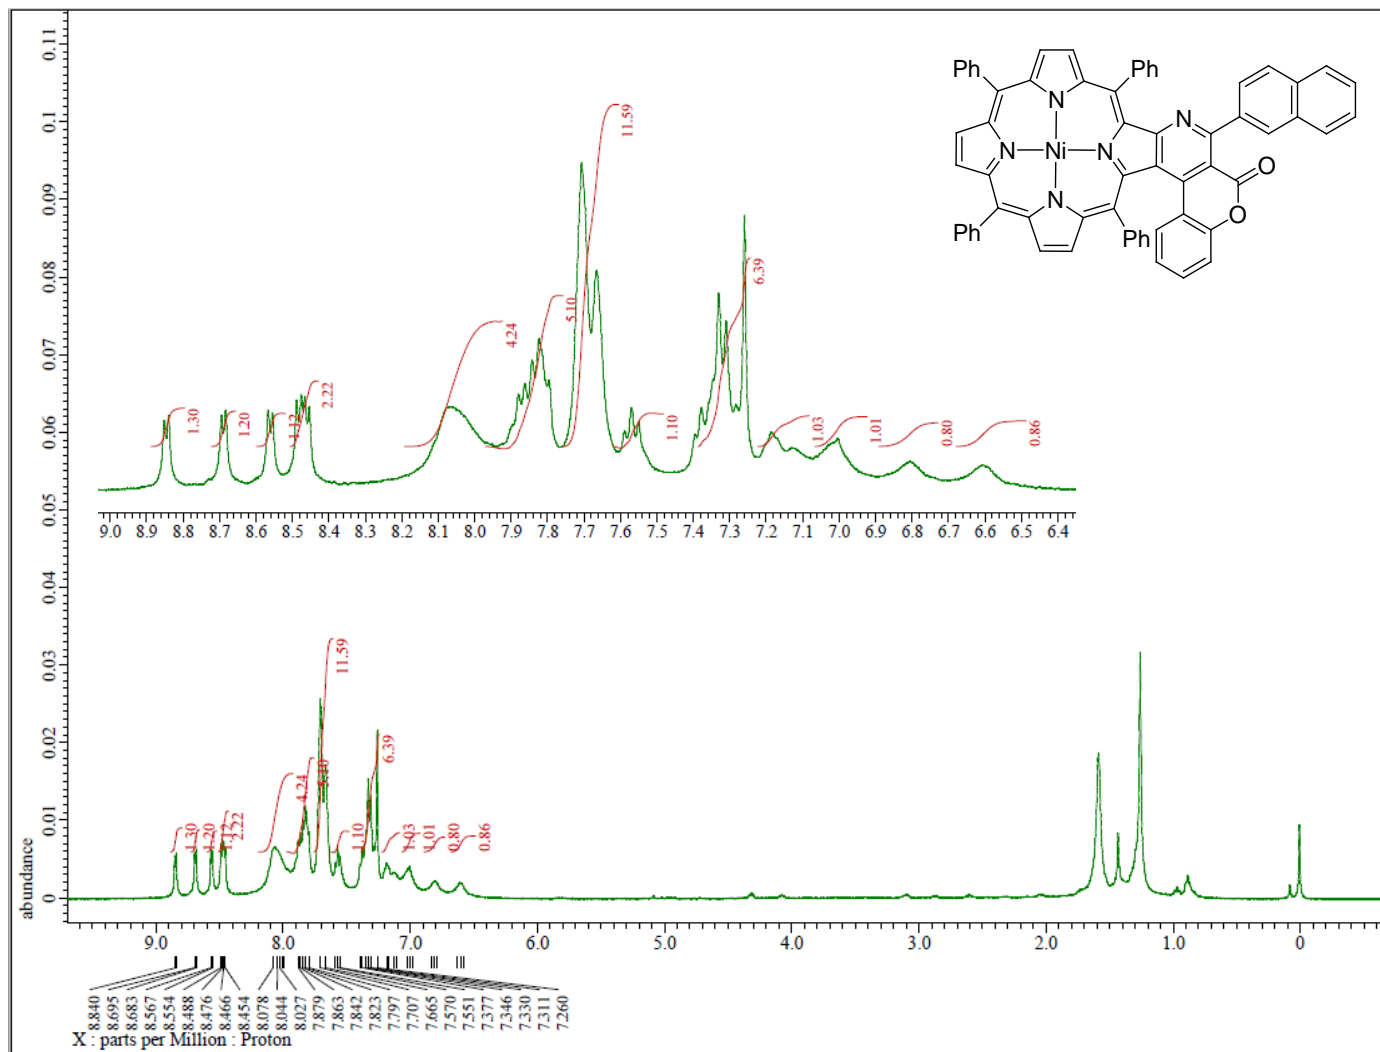

**Figure S17.**  $^1\text{H}$  NMR spectrum of compound **(6e)** in  $\text{CDCl}_3$

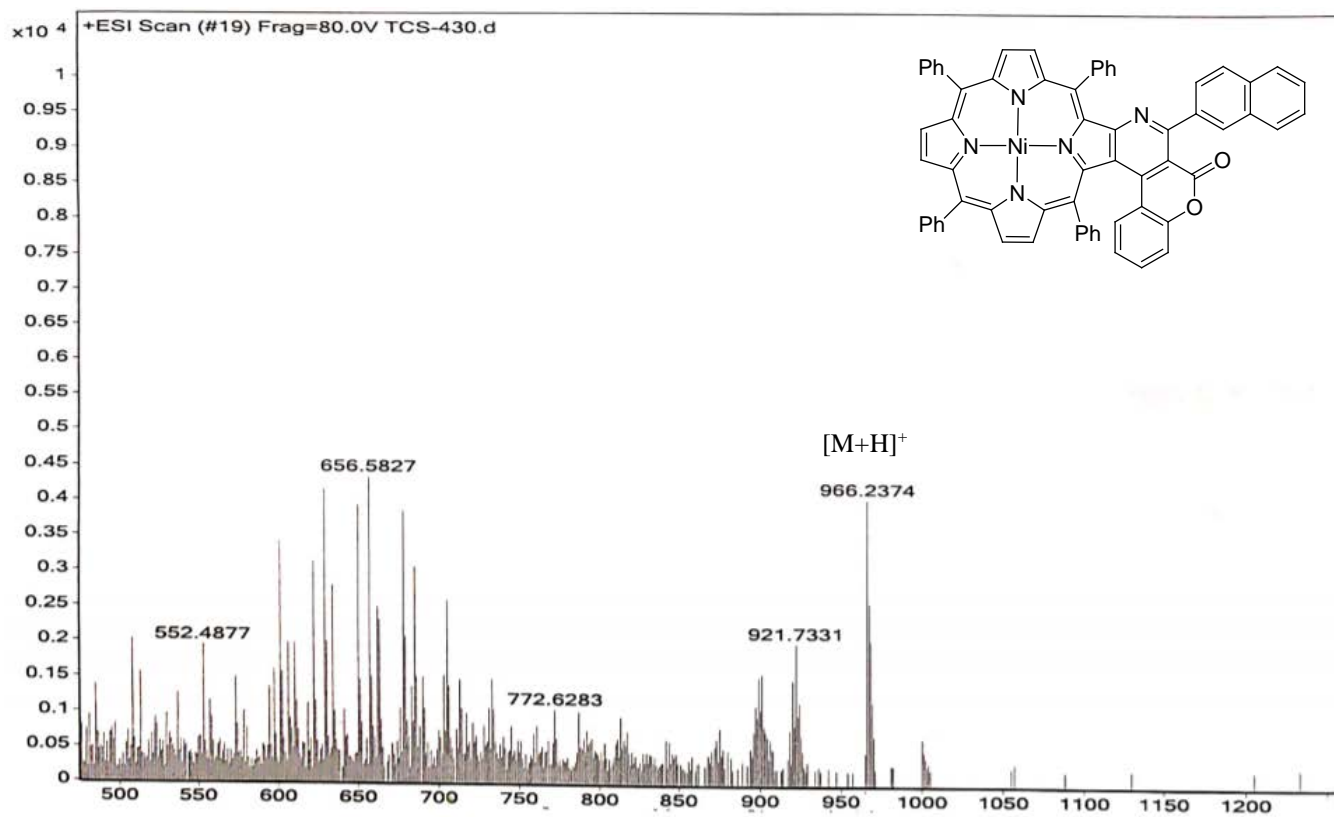

**Figure S18.** ESI mass spectrum of compound (**6e**)



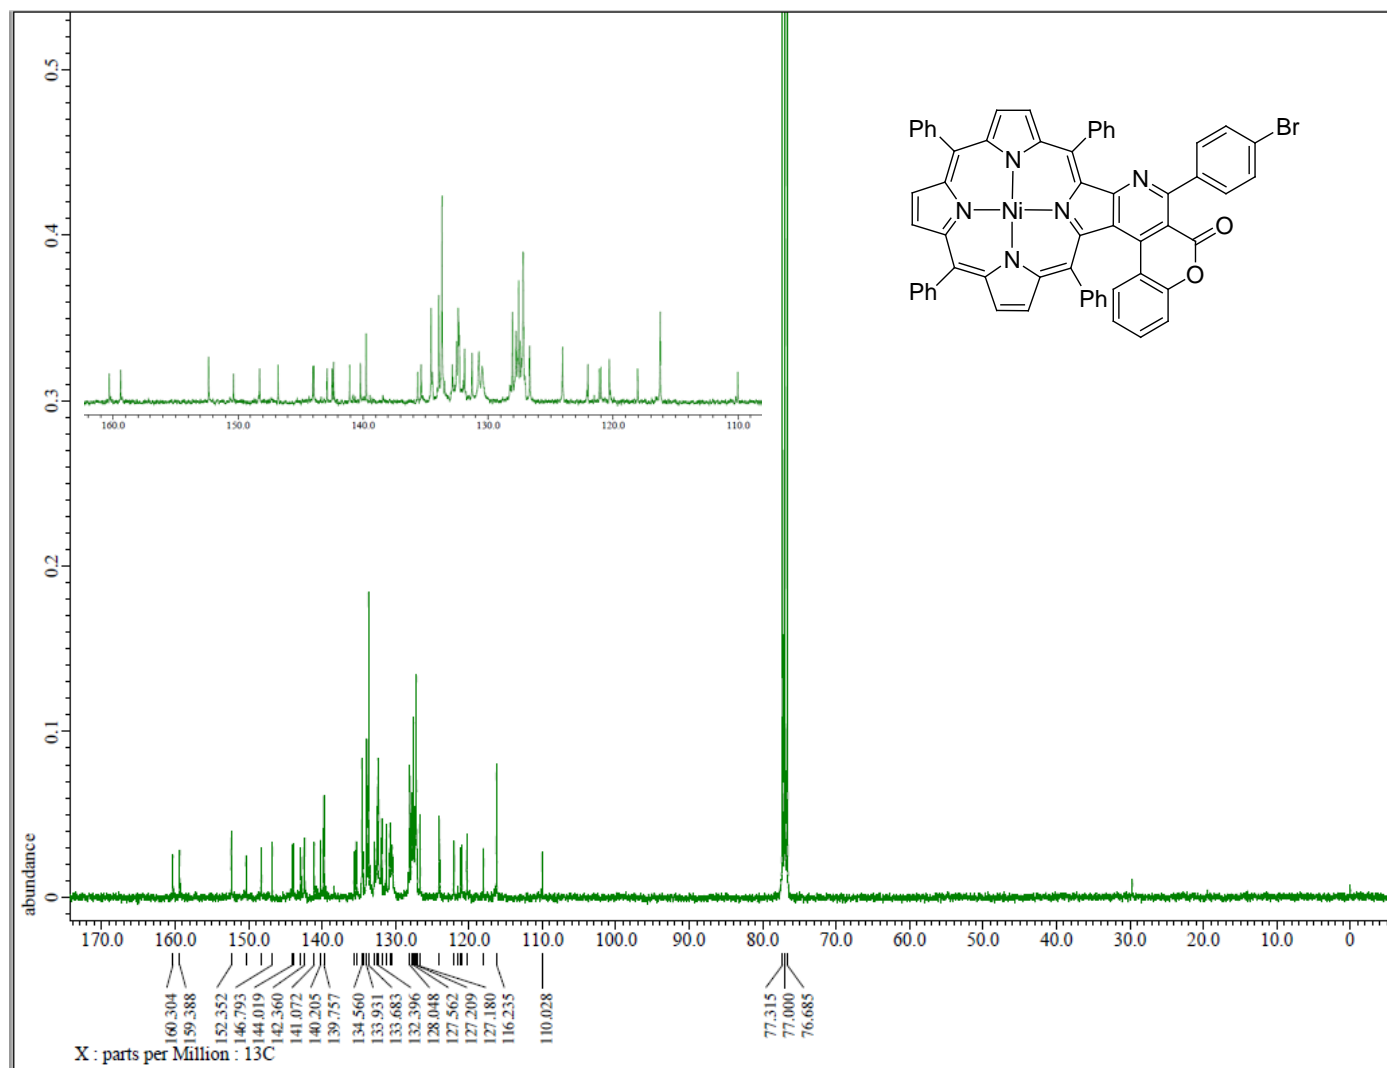

**Figure S20.**  $^{13}\text{C}$  NMR spectrum of compound (6f) in  $\text{CDCl}_3$

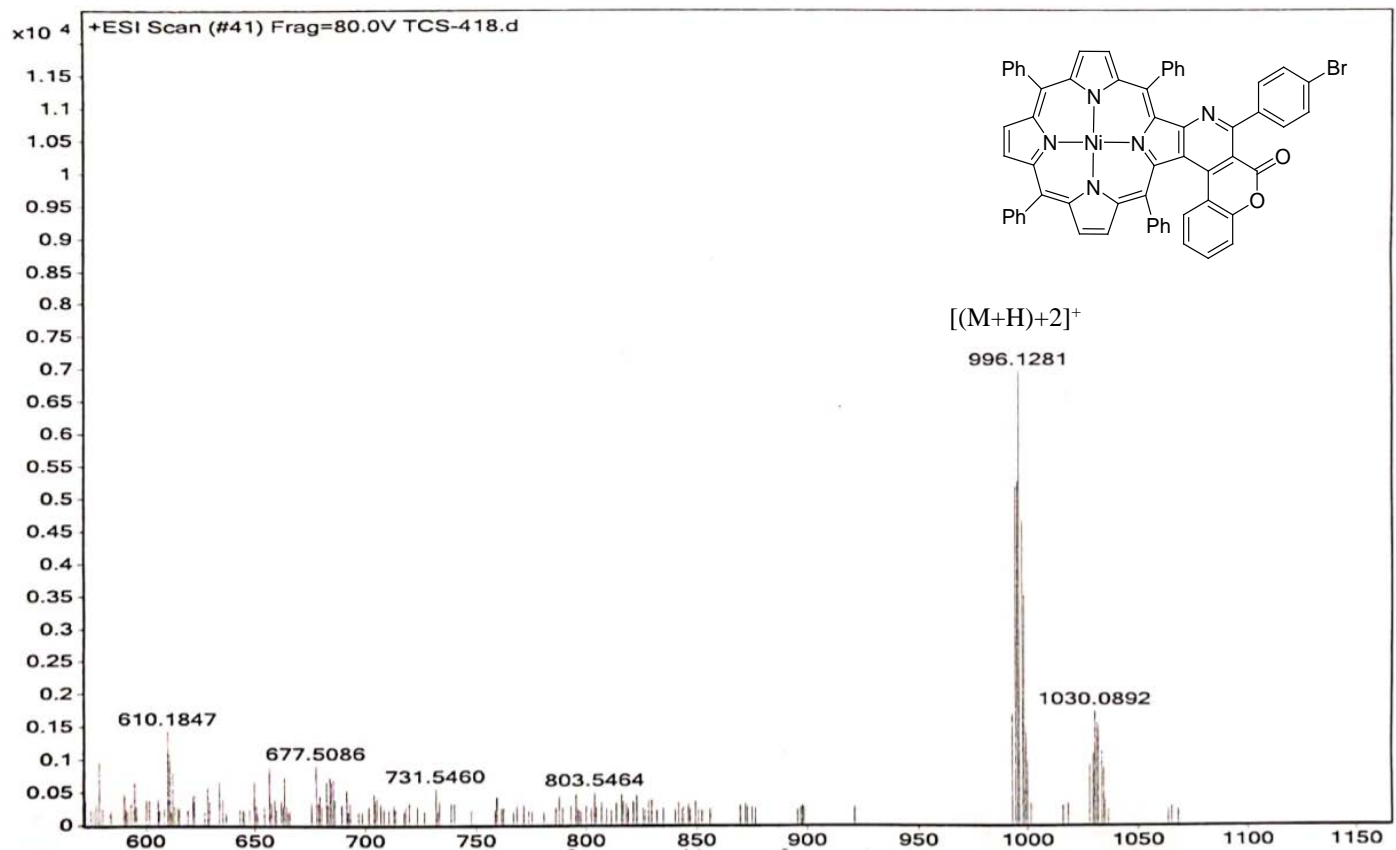

Figure S21. ESI mass spectrum of compound (6f)

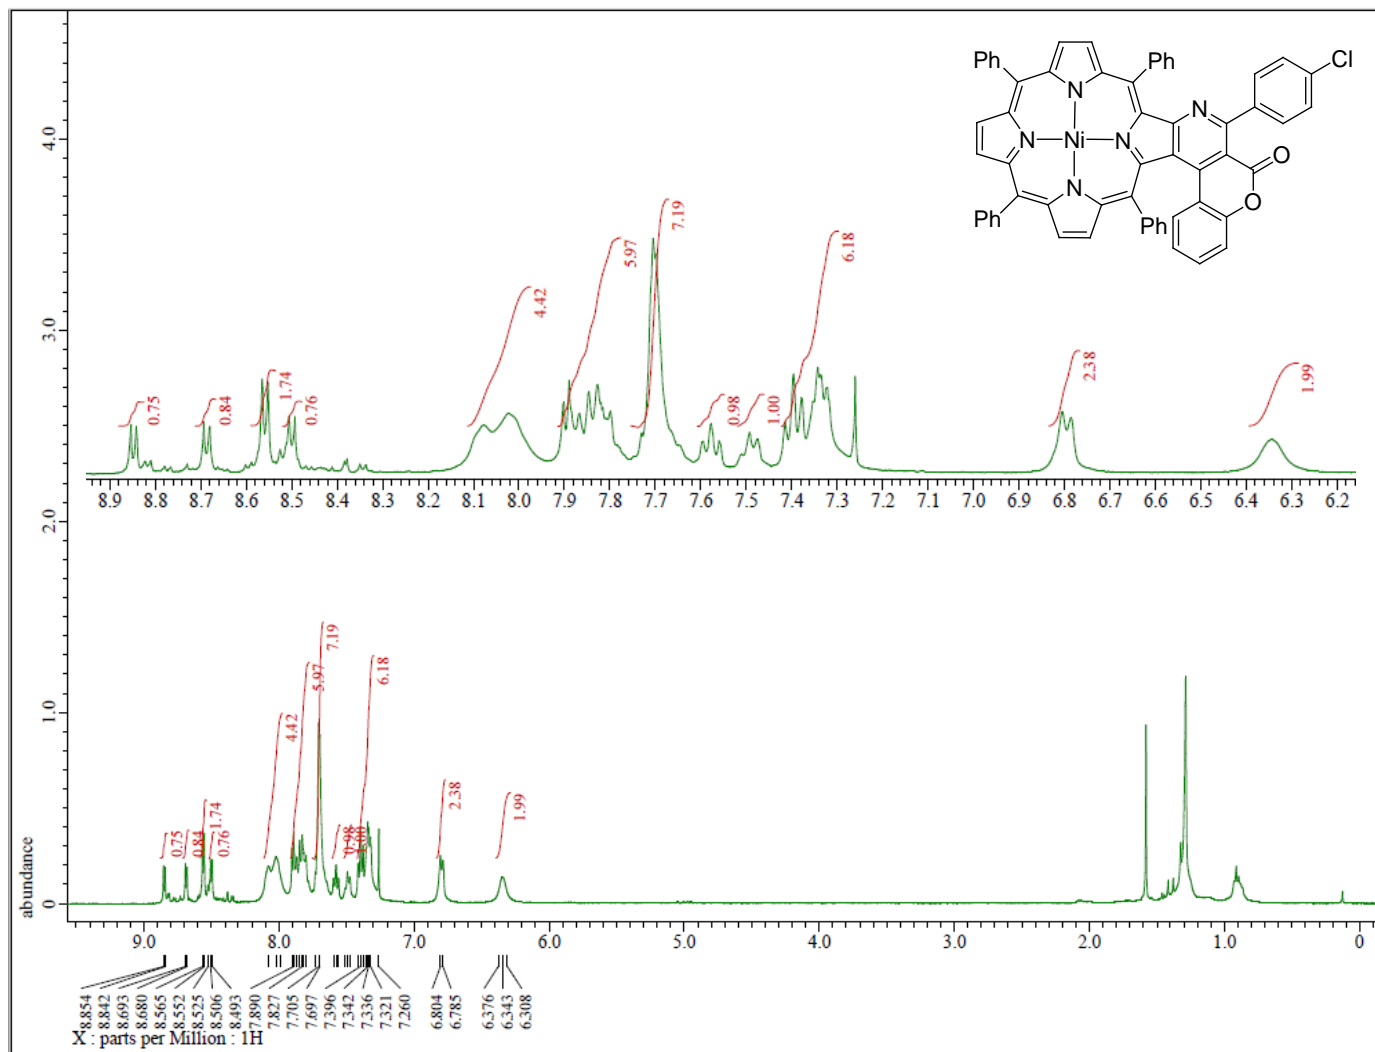

**Figure S22.**  $^1\text{H}$  NMR spectrum of compound **(6g)** in  $\text{CDCl}_3$

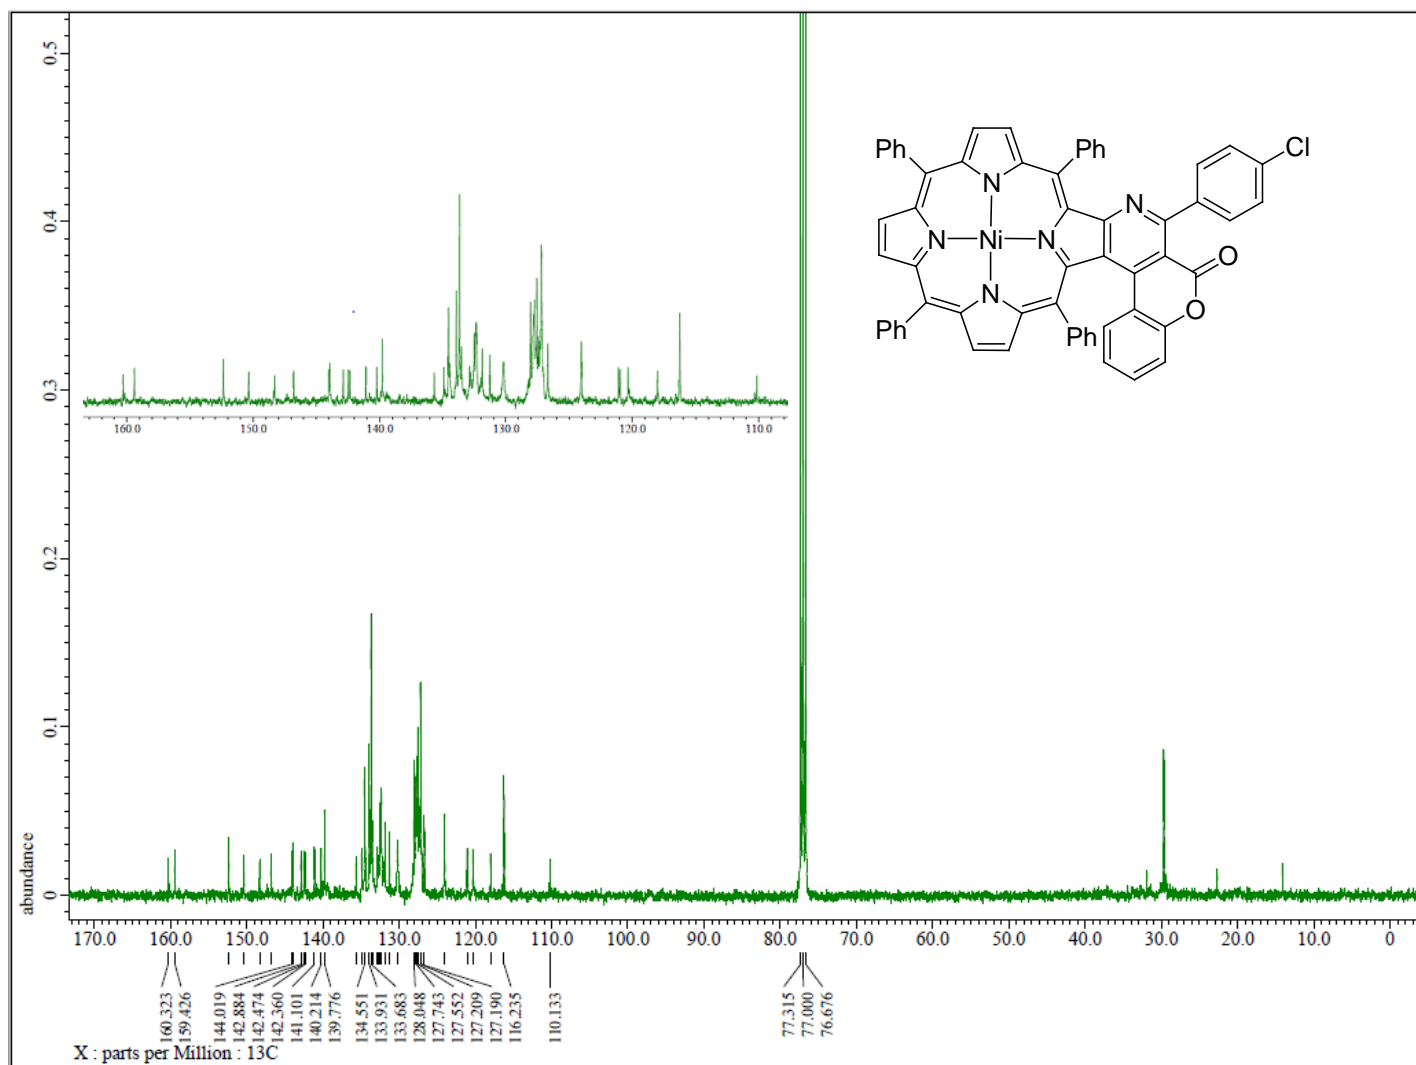

**Figure S23.**  $^{13}\text{C}$  NMR spectrum of compound (**6g**) in  $\text{CDCl}_3$



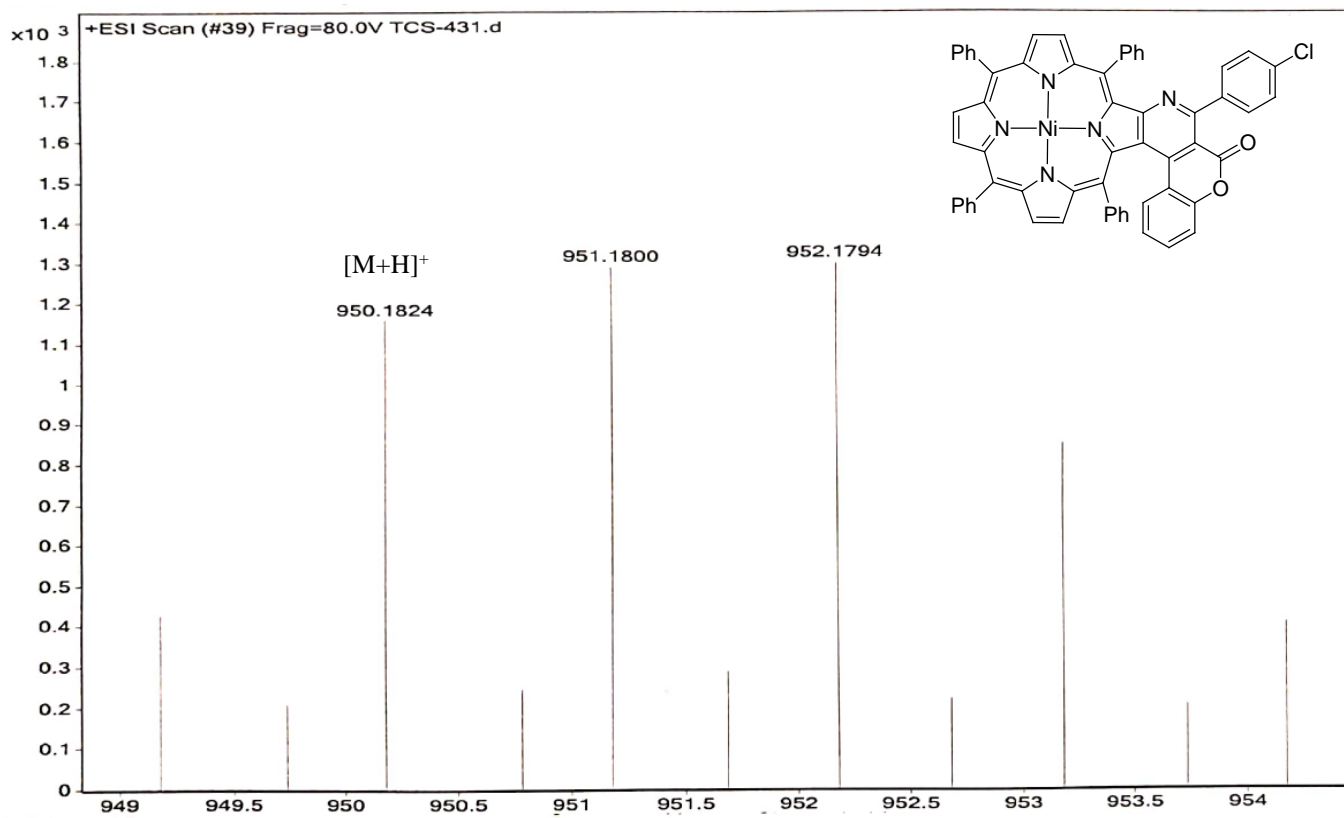

Figure S24. ESI mass spectrum of compound (6g)

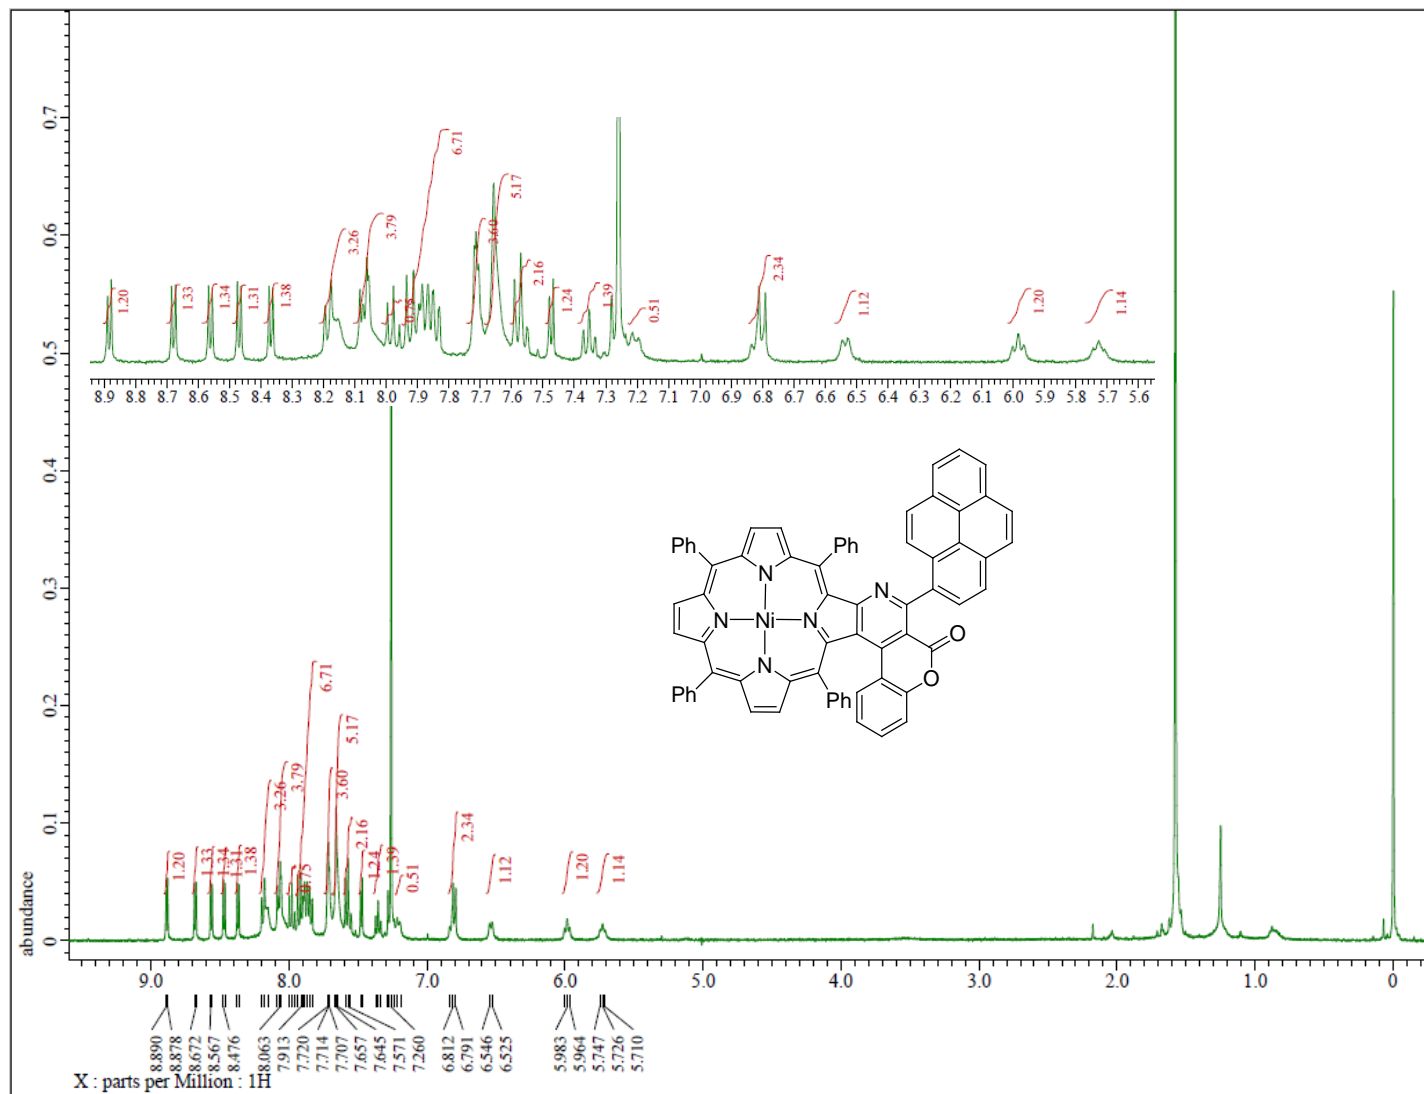

Figure S25.  $^1\text{H}$  NMR spectrum of compound (**6h**) in  $\text{CDCl}_3$

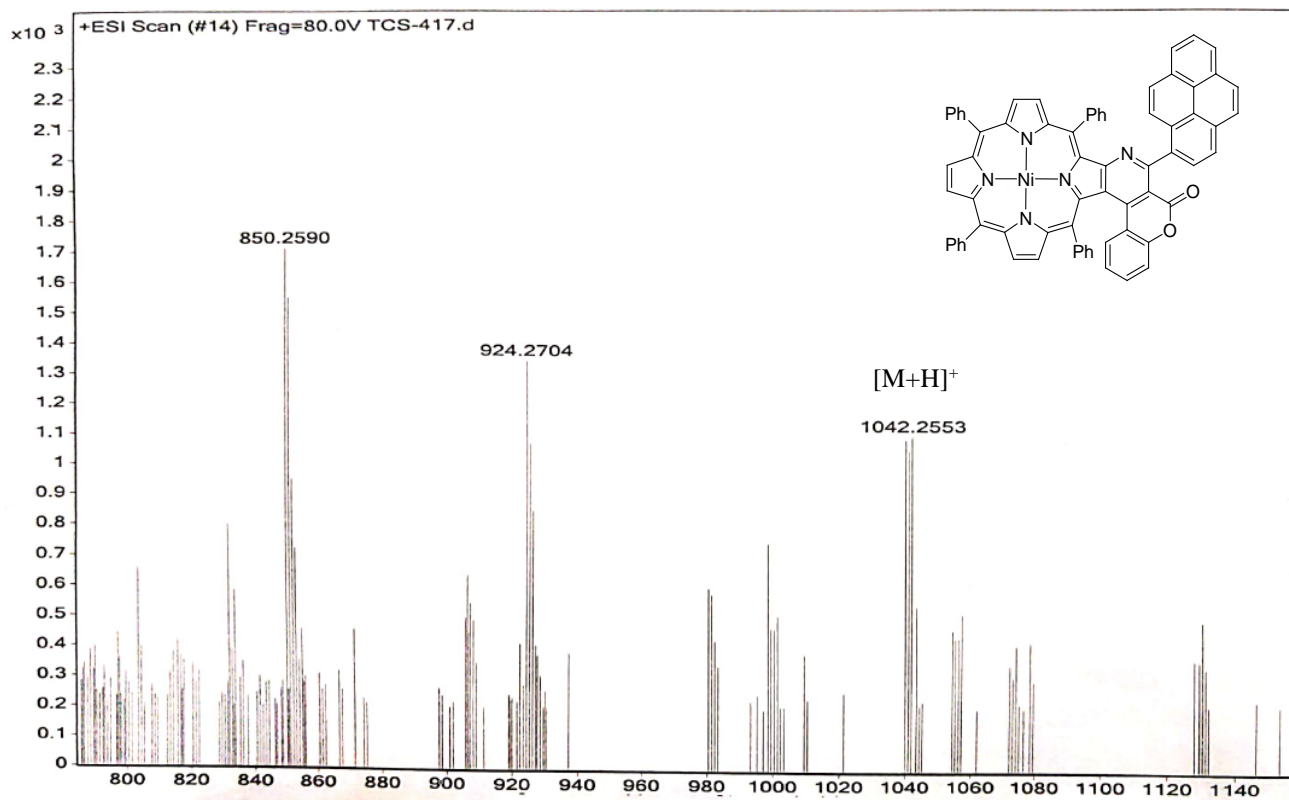

Figure S26. ESI mass spectrum of compound (6h)

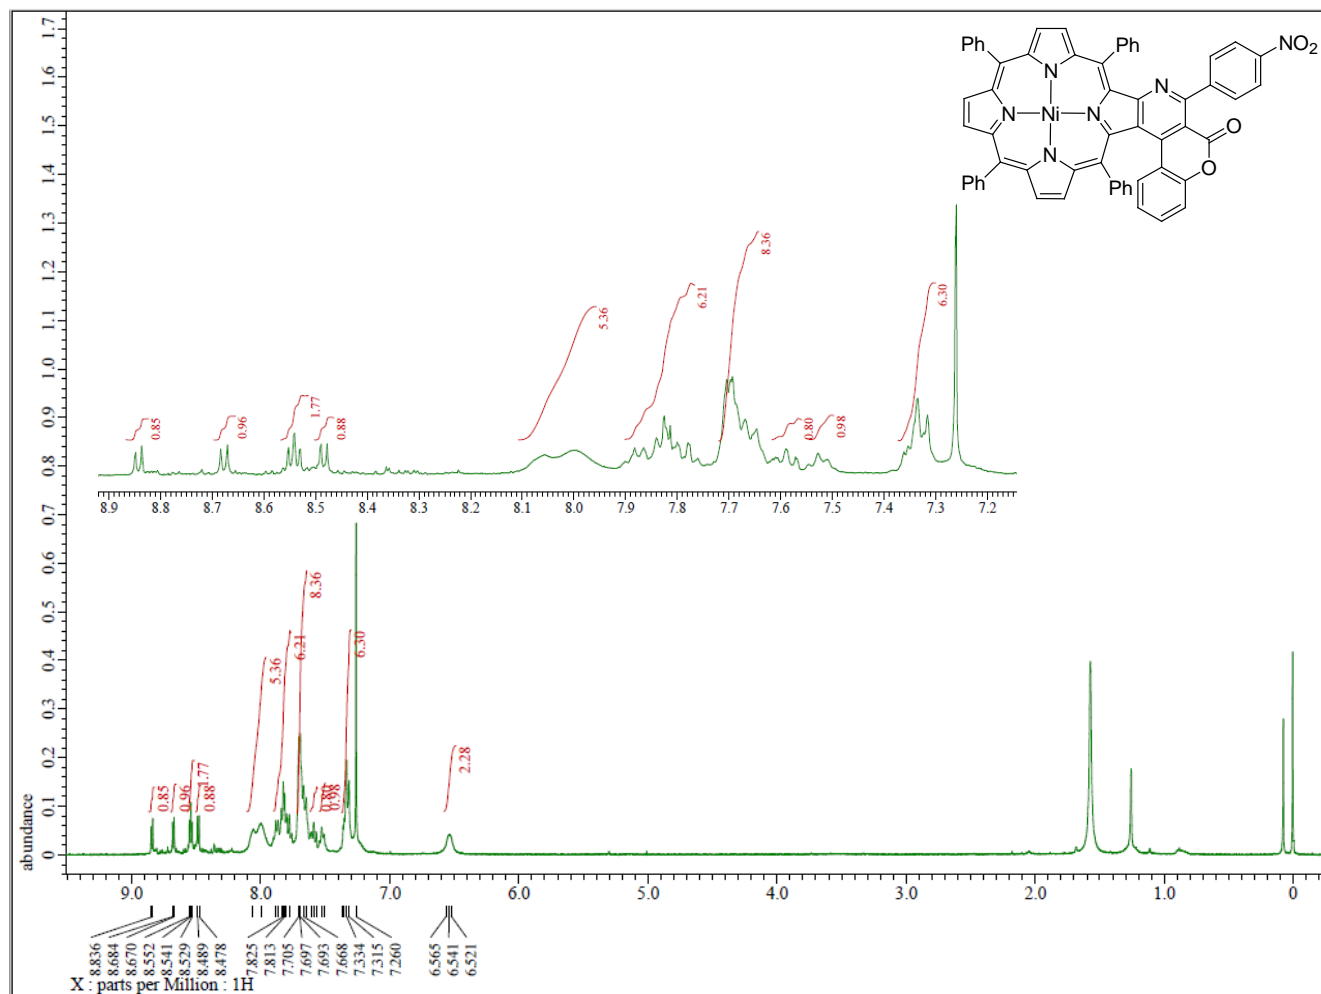

Figure S27.  $^1\text{H}$  NMR spectrum of compound (6i) in  $\text{CDCl}_3$

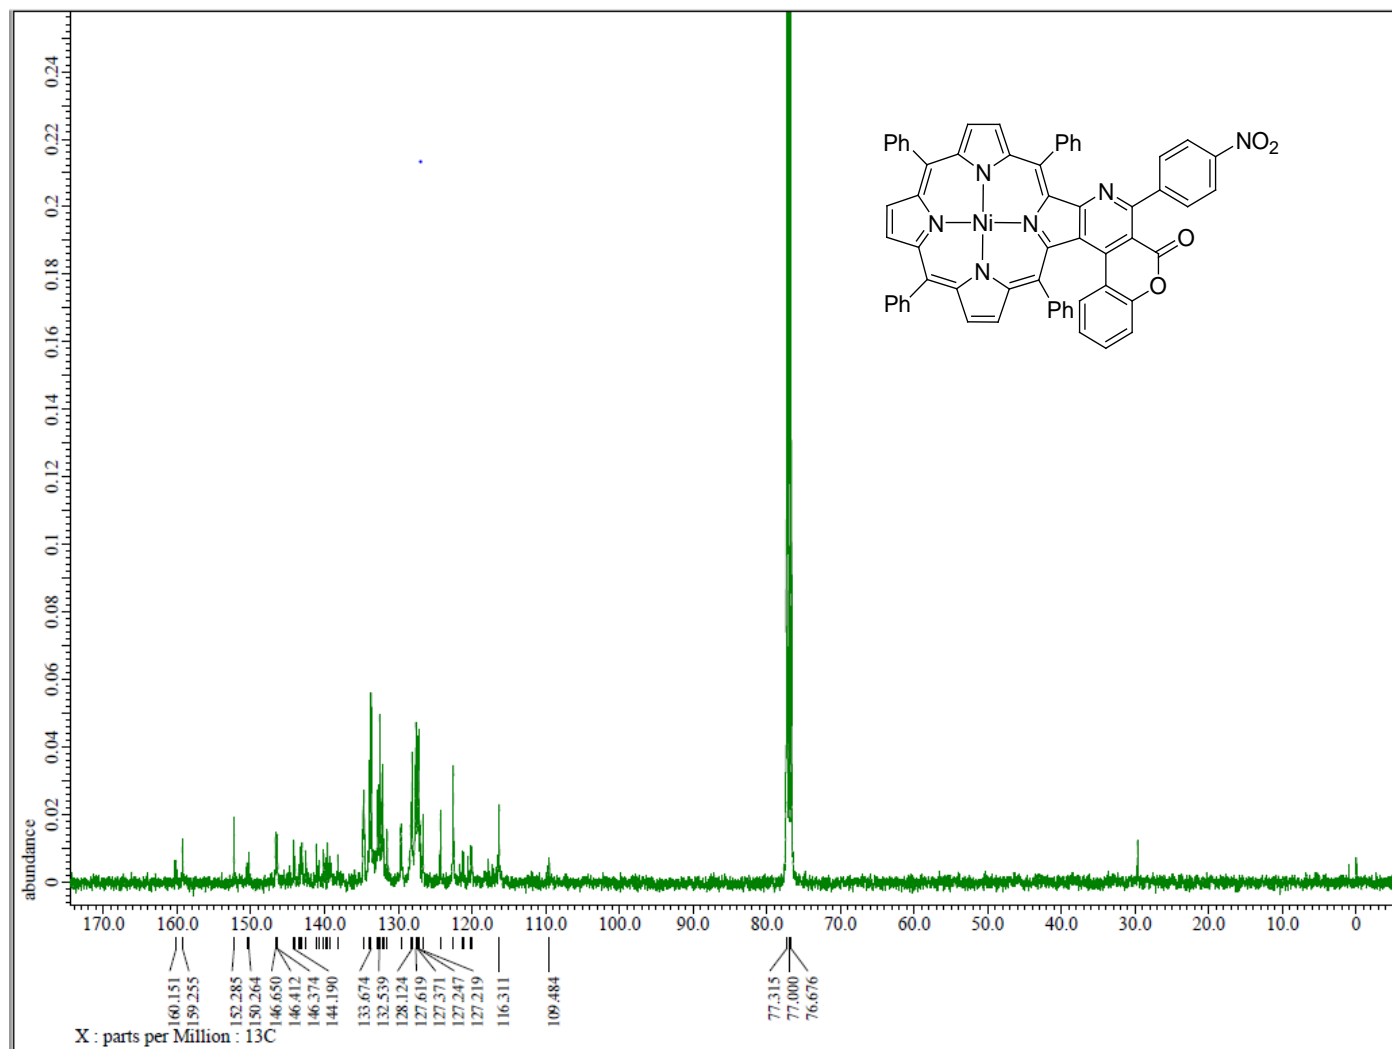

Figure S28. <sup>13</sup>C NMR spectrum of compound (6i) in CDCl<sub>3</sub>

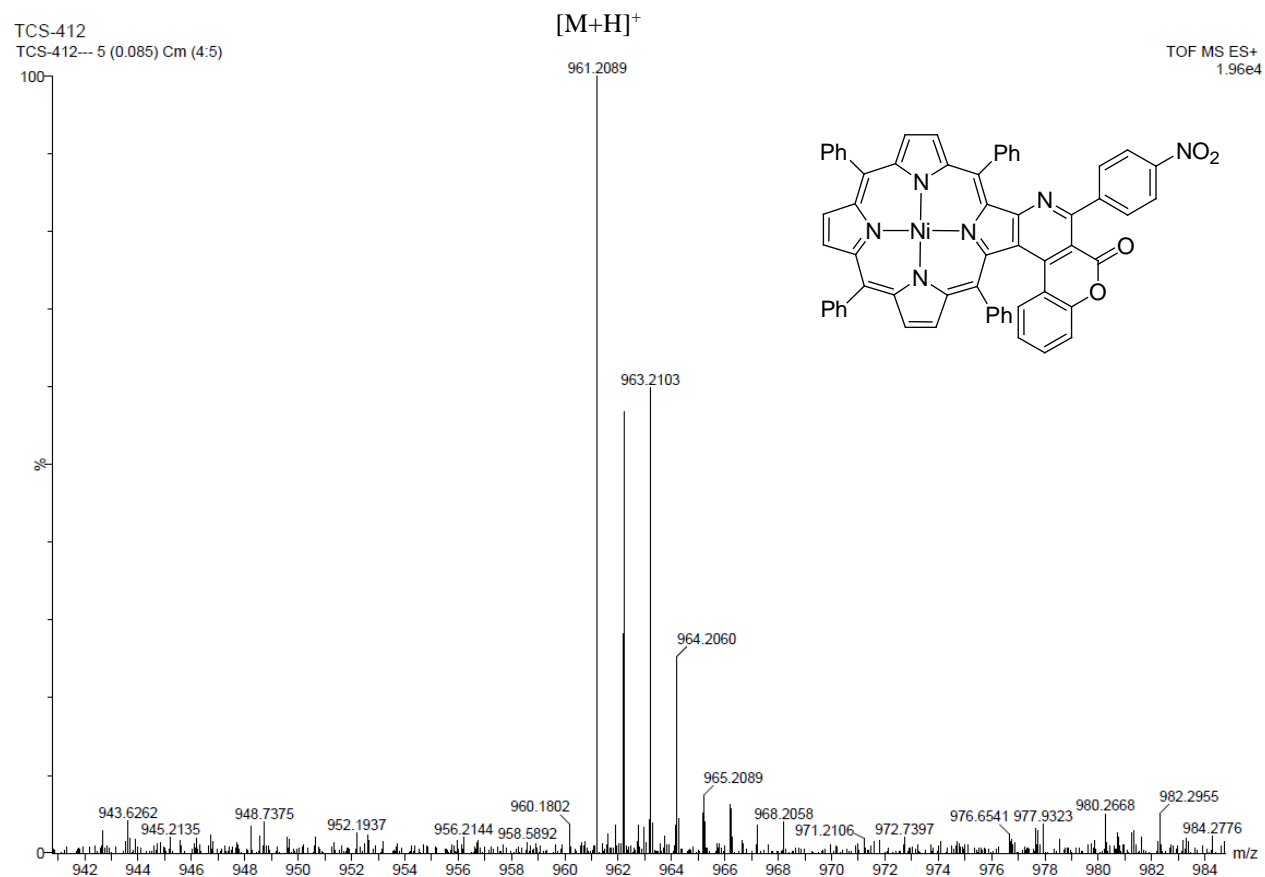

**Figure S29.** ESI mass spectrum of compound (**6i**)

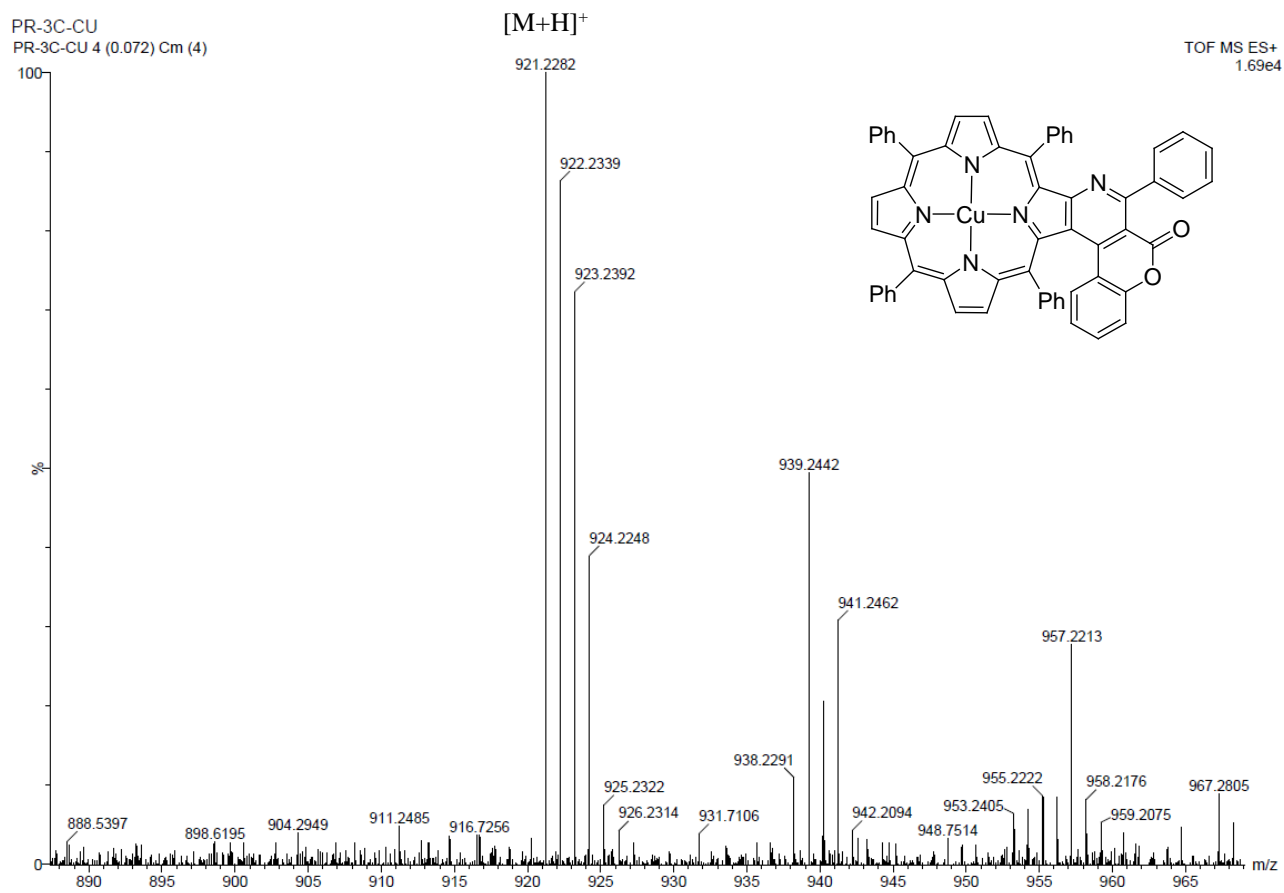

**Figure S30.** ESI mass spectrum of compound (7)

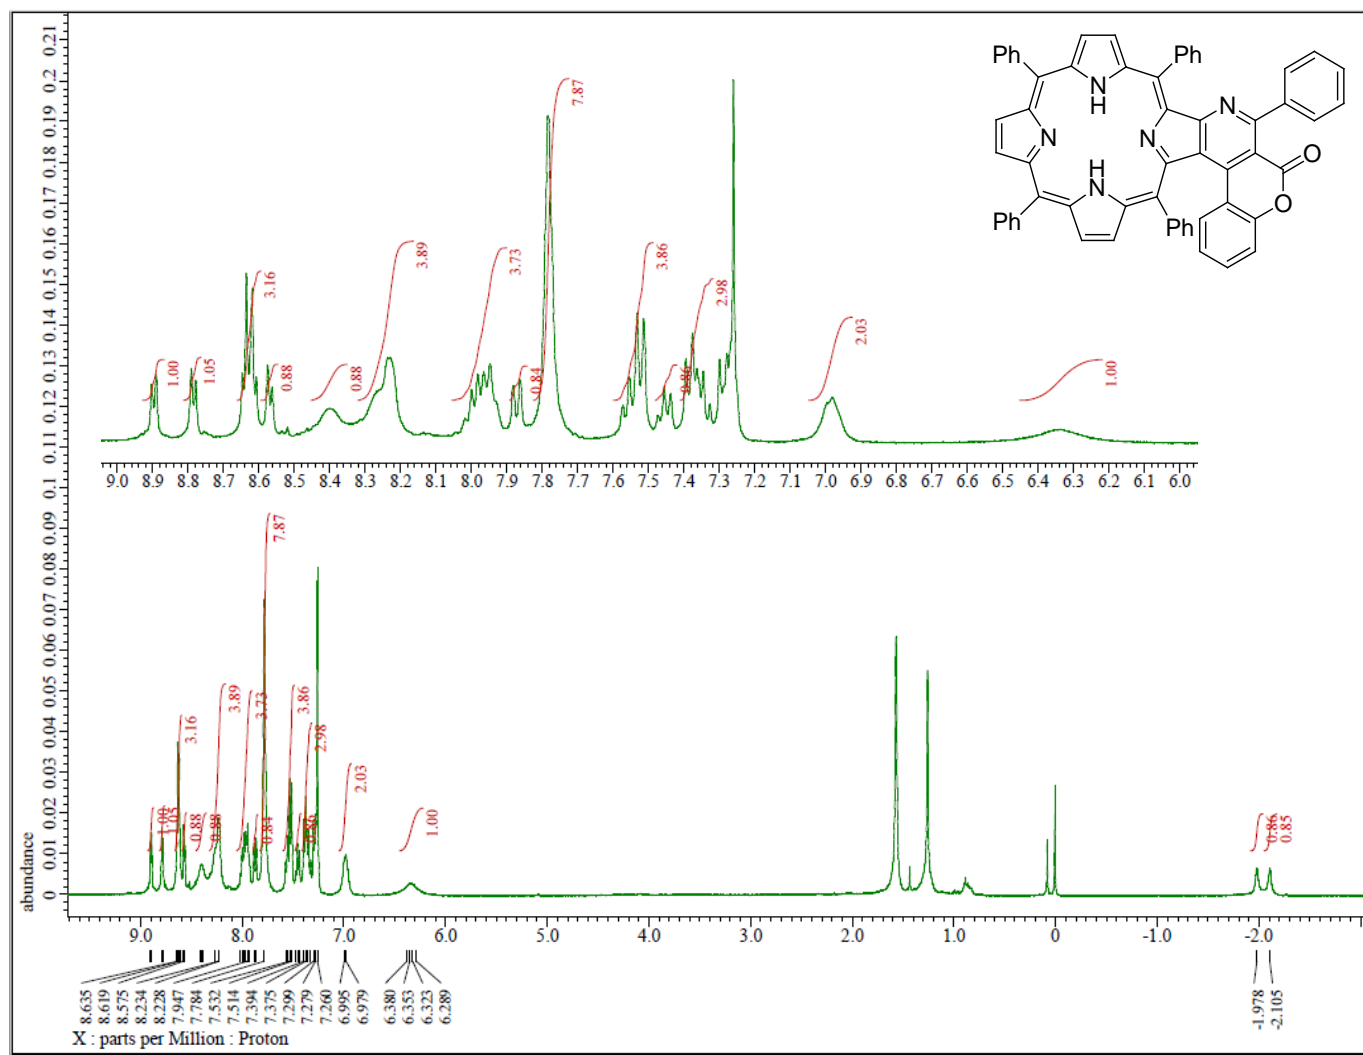

Figure S31.  $^1\text{H}$  NMR spectrum of compound (8) in  $\text{CDCl}_3$





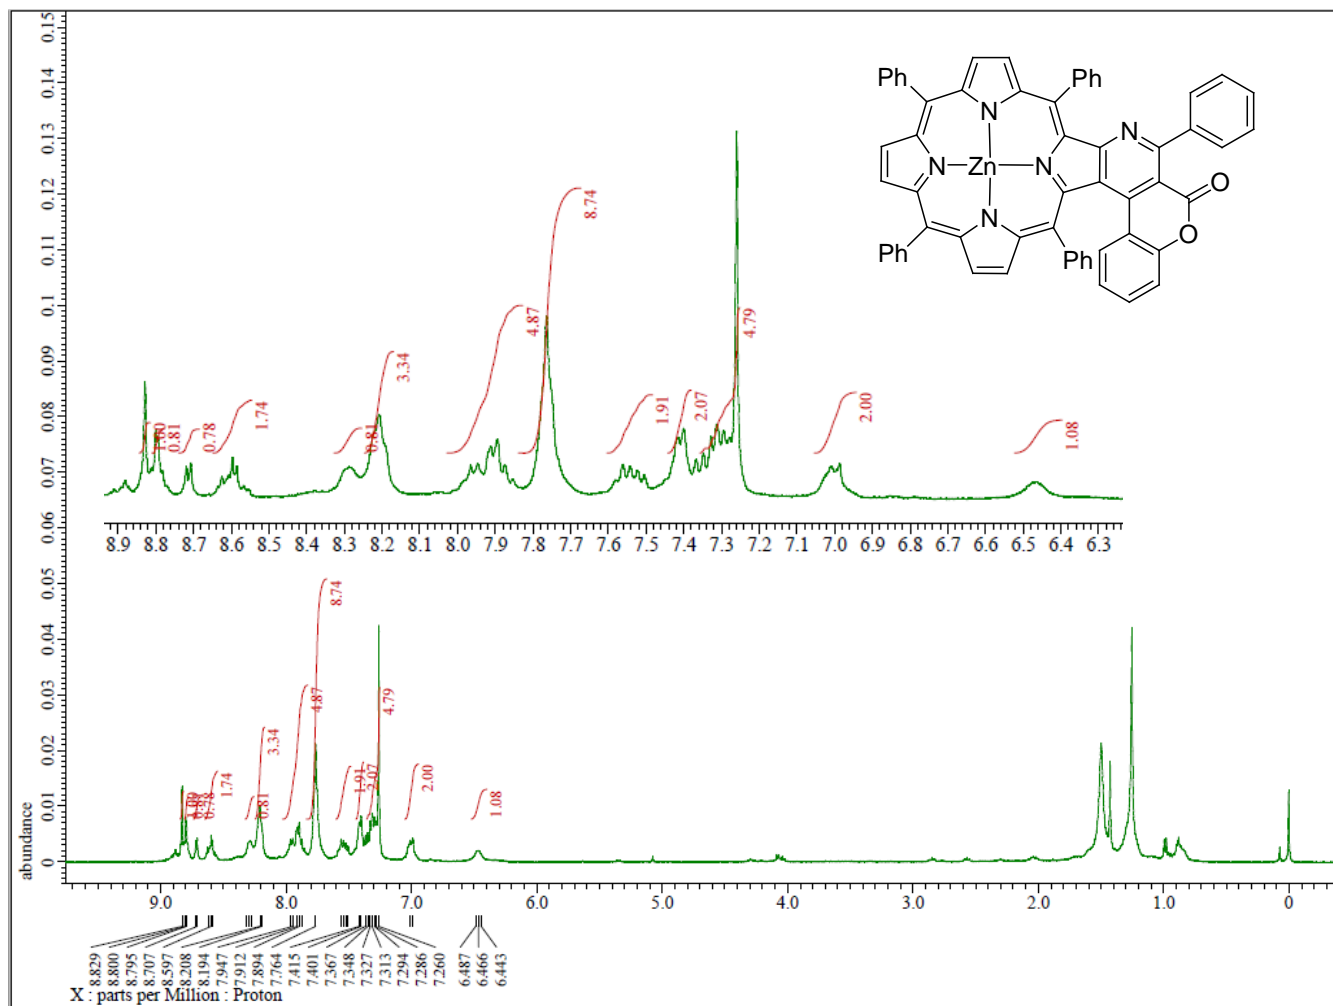

Figure S33.  $^1\text{H}$  NMR spectrum of compound (9) in  $\text{CDCl}_3$

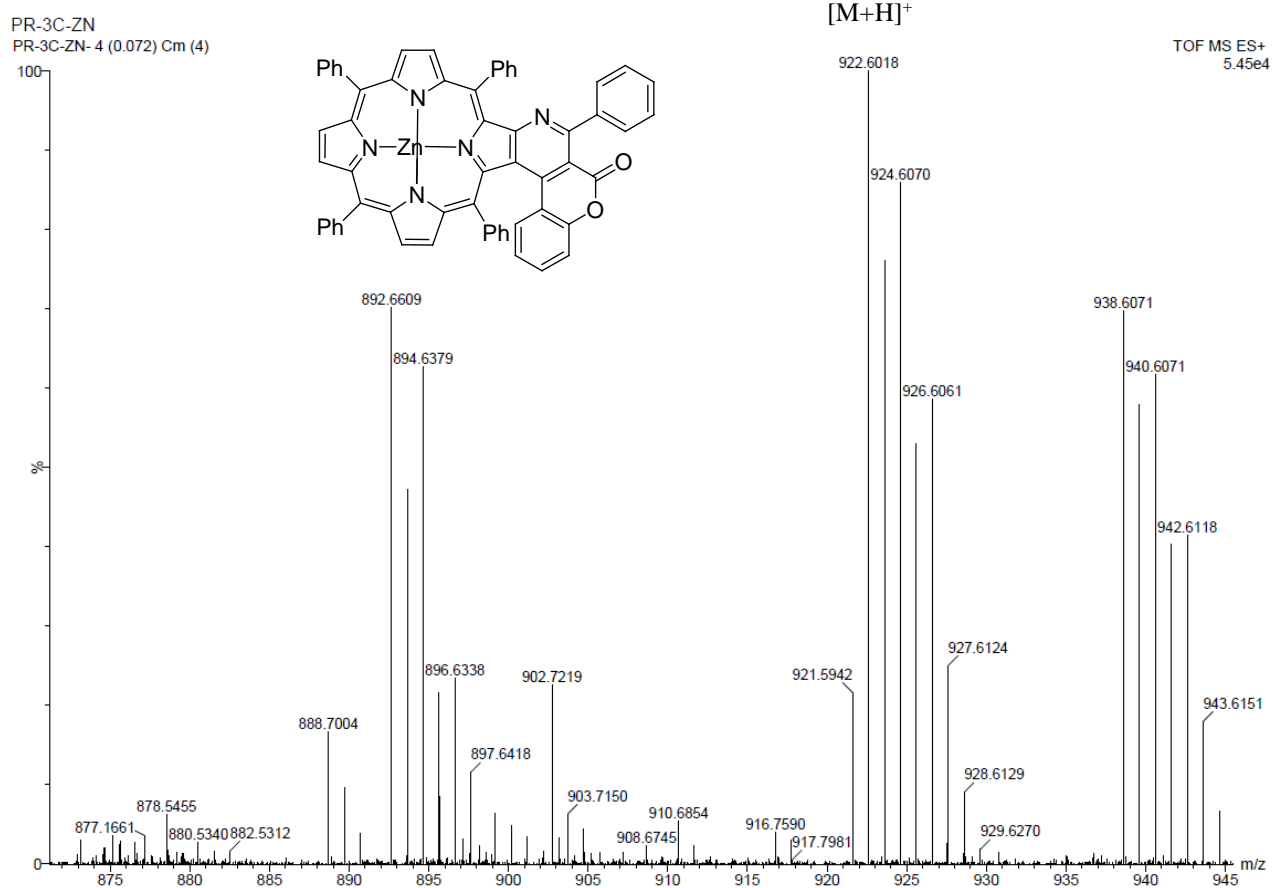

**Figure S34.** ESI mass spectrum of compound (9)
